# Supplementary material for: Horizontally Arranged Zinc Platelet Electrodeposits Modulated by Fluorinated Covalent Organic Framework Film for High-Rate and Durable Aqueous Zinc Ion Batteries
Source: Research Square preprint supplement (doi:10.21203/rs.3.rs-494431/v1), 2021-05-11
Supplement: Supplementary file 1 [file 4386cd88049a950a48eb7ce8.docx]

**Supplementary Materials for**

# Horizontally Arranged Zinc Platelet Electrodeposits Modulated by Fluorinated Covalent Organic Framework Film for High-Rate and Durable Aqueous Zinc Ion Batteries

*Zedong Zhao§1, Rong Wang§1, Chengxin Peng***2, Wuji Chen1, Tianqi Wu1, Bo Hu1, Jiaxi Zeng1, Peiying Liu1, Yicheng Liu1, Jia Guo***1, Hongbin Lu** and Zaiping Guo**3*

*1State Key Laboratory of Molecular Engineering of Polymers, Department of Macromolecular Science*

*Fudan University, 2005 Songhu Road, Shanghai 200438, China;*

*2School of Materials Science & Engineering, University of Shanghai for Science and Technology, Shanghai 200093, China*

*3Chemical Engineering & Advanced Materials, The University of Adelaide, Adelaide, SA 5005, Australia*

*§Both these authors contributed equally to this work*

**Supplementary Figures**


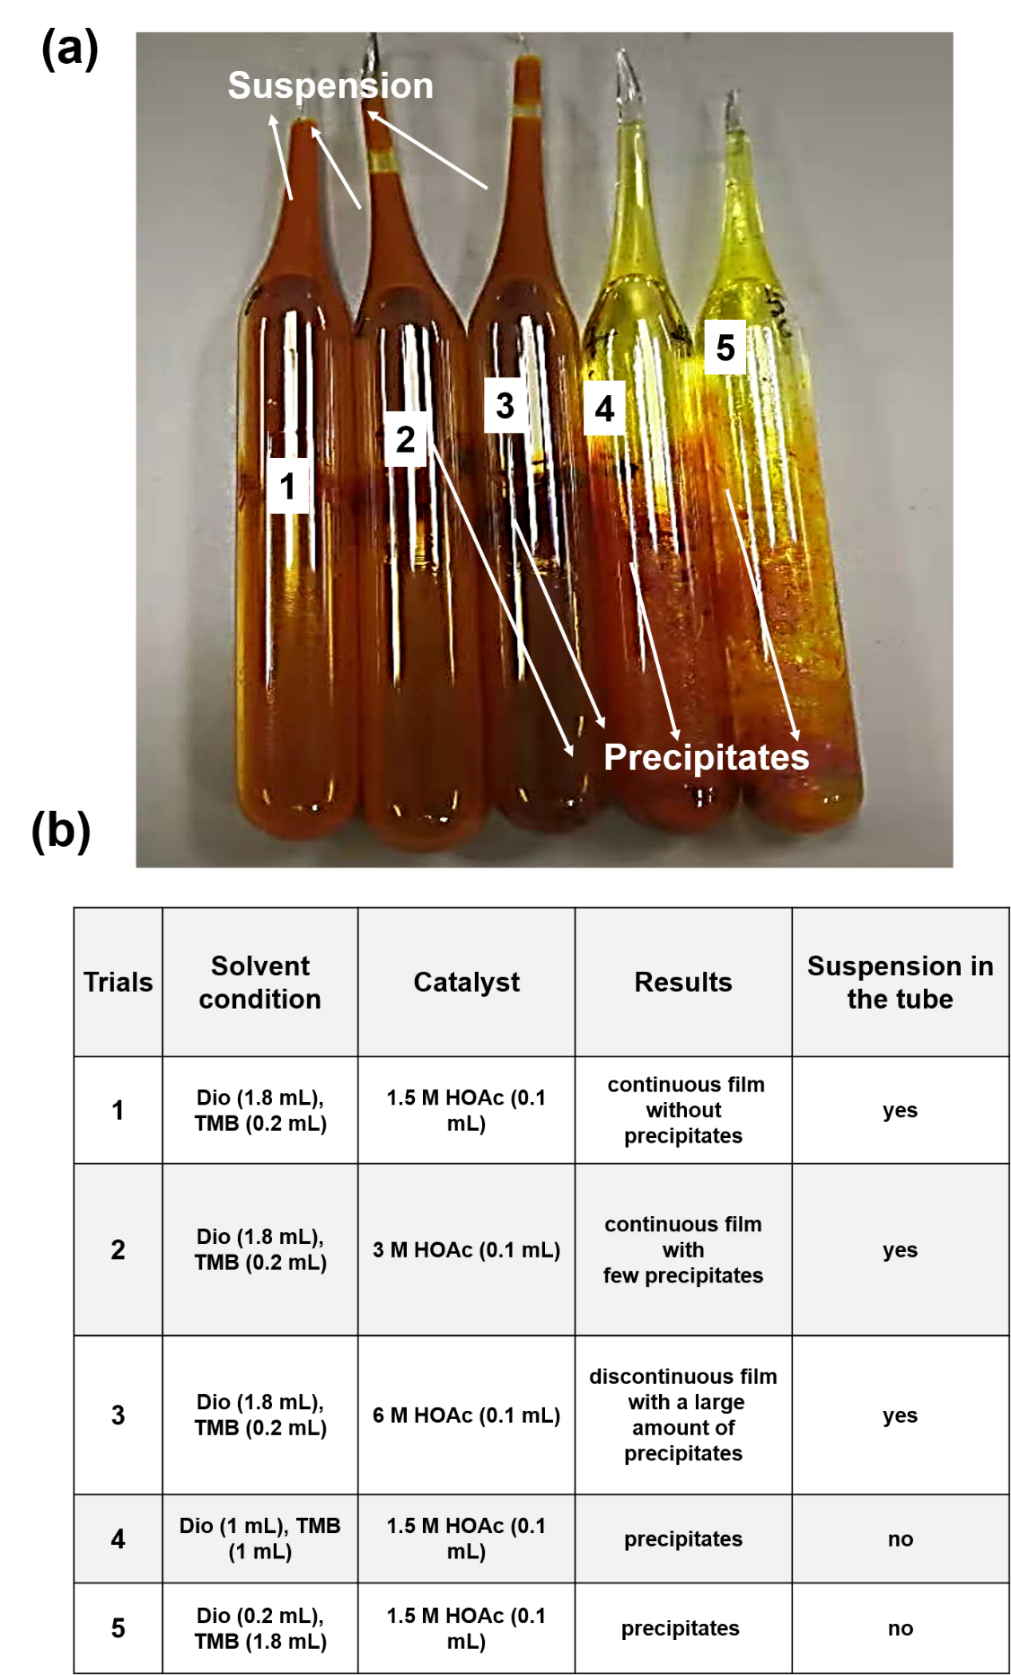


**Supplementary Fig. 1: Comparison of the synthesis conditions of the FCOF films. a:** Photos of the solvothermal glass tubes with different reaction conditions and **b:** Corresponding details of the ingredients and obtained products.


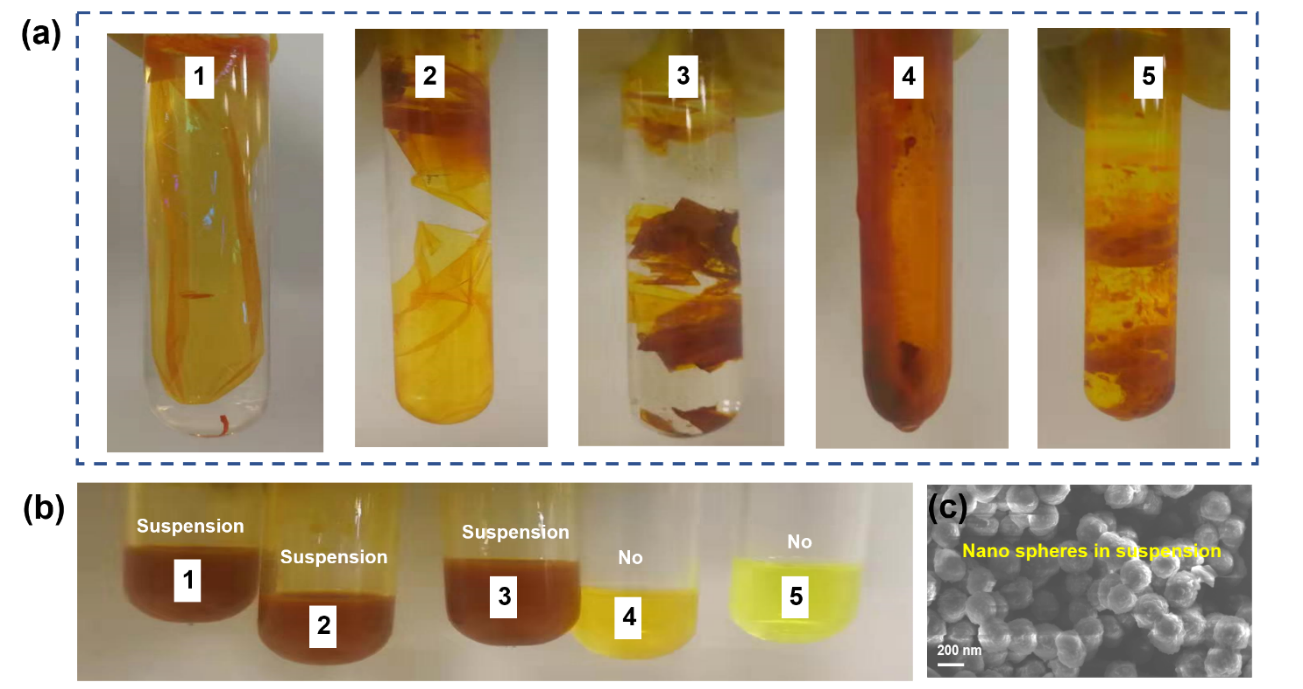


**Supplementary Fig. 2: Product comparison after reaction. a:** Photos of the solvothermal glass tubes showing the obtained FCOF films from different reaction conditions. **b:** the solutions taken out of the tubes after reaction. **c:** FESEM image showing uniform-size nano spheres in a typical suspension.


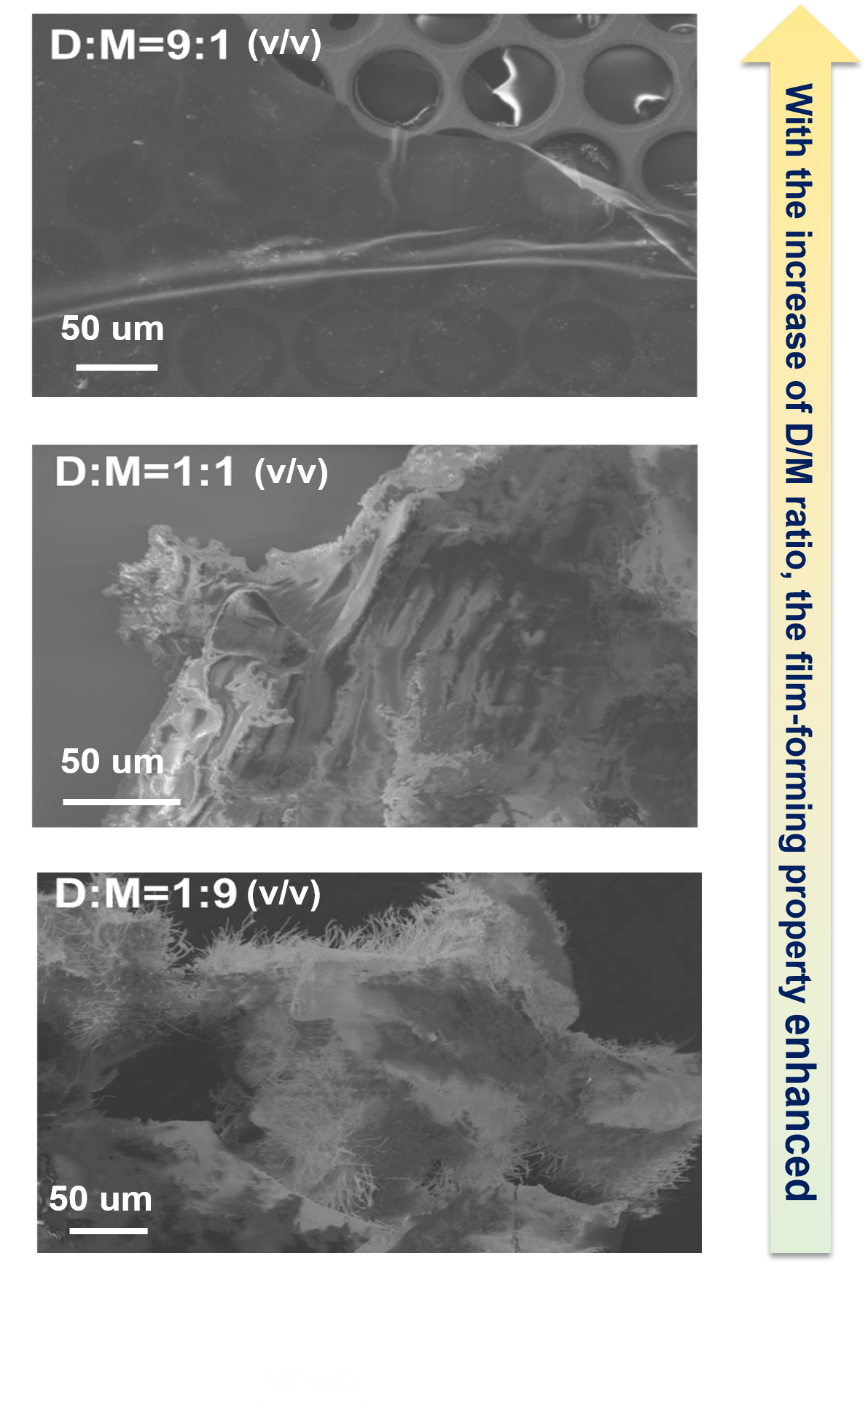


**Supplementary Fig. 3: FESEM images of the FCOF films prepared with different D/M ratios.** The results show that increasing the D/M ratio is important to achieve a high quality film.


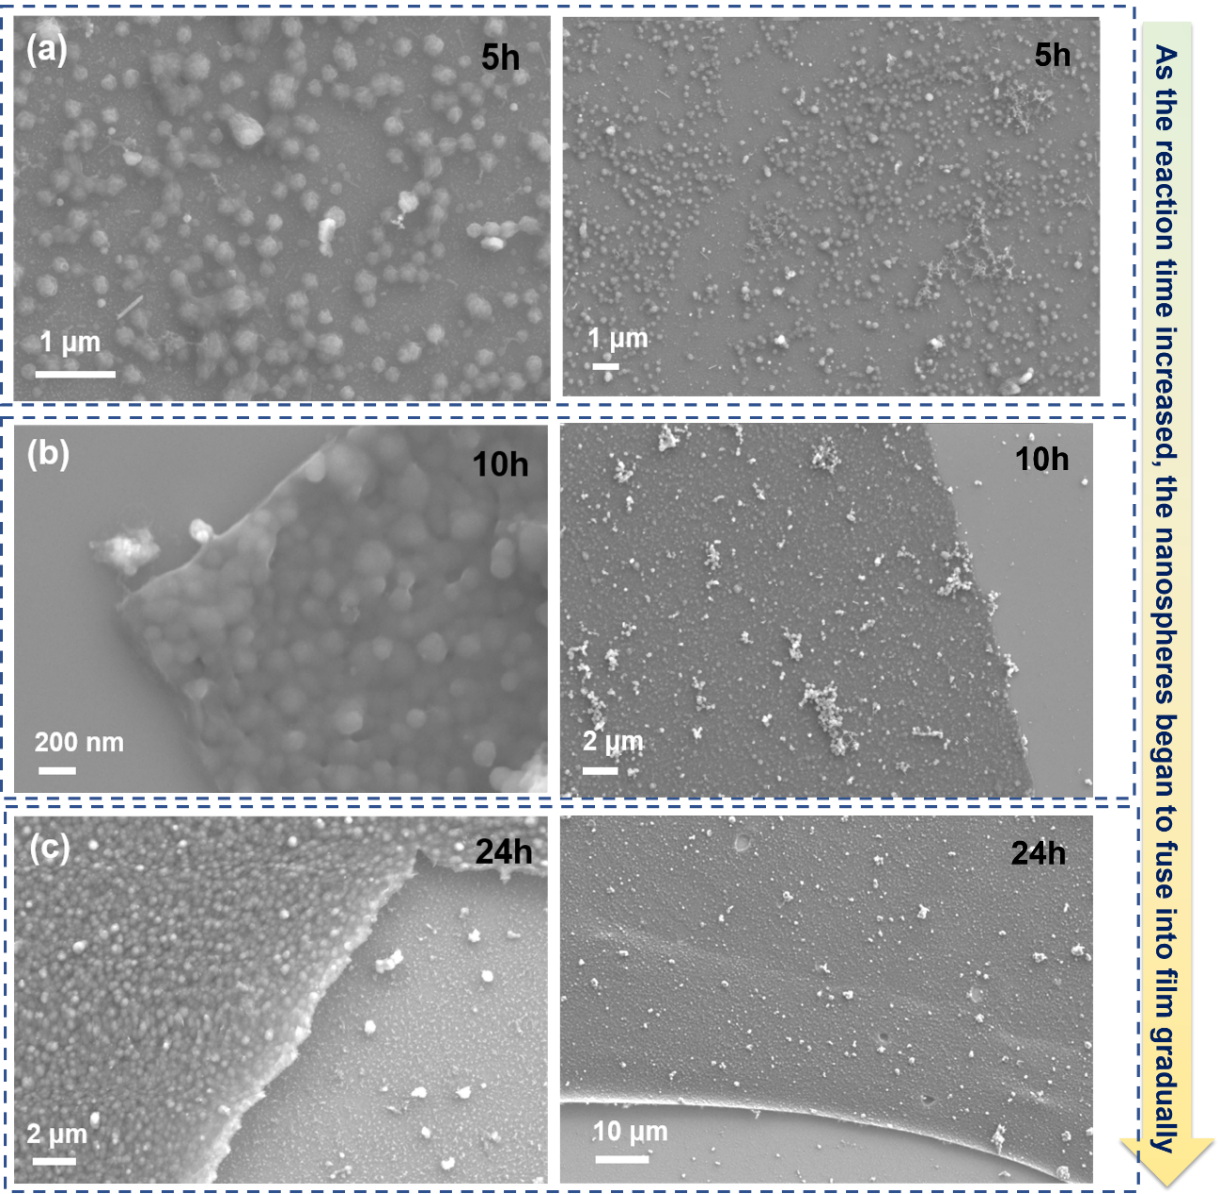


**Supplementary Fig. 4: FESEM images of the FCOF film grown on silicon substrate at different reaction times.** The results show that the growth mechanism of the FCOF film assembly and fusion of the nano-spheres suspended in the reaction solution.


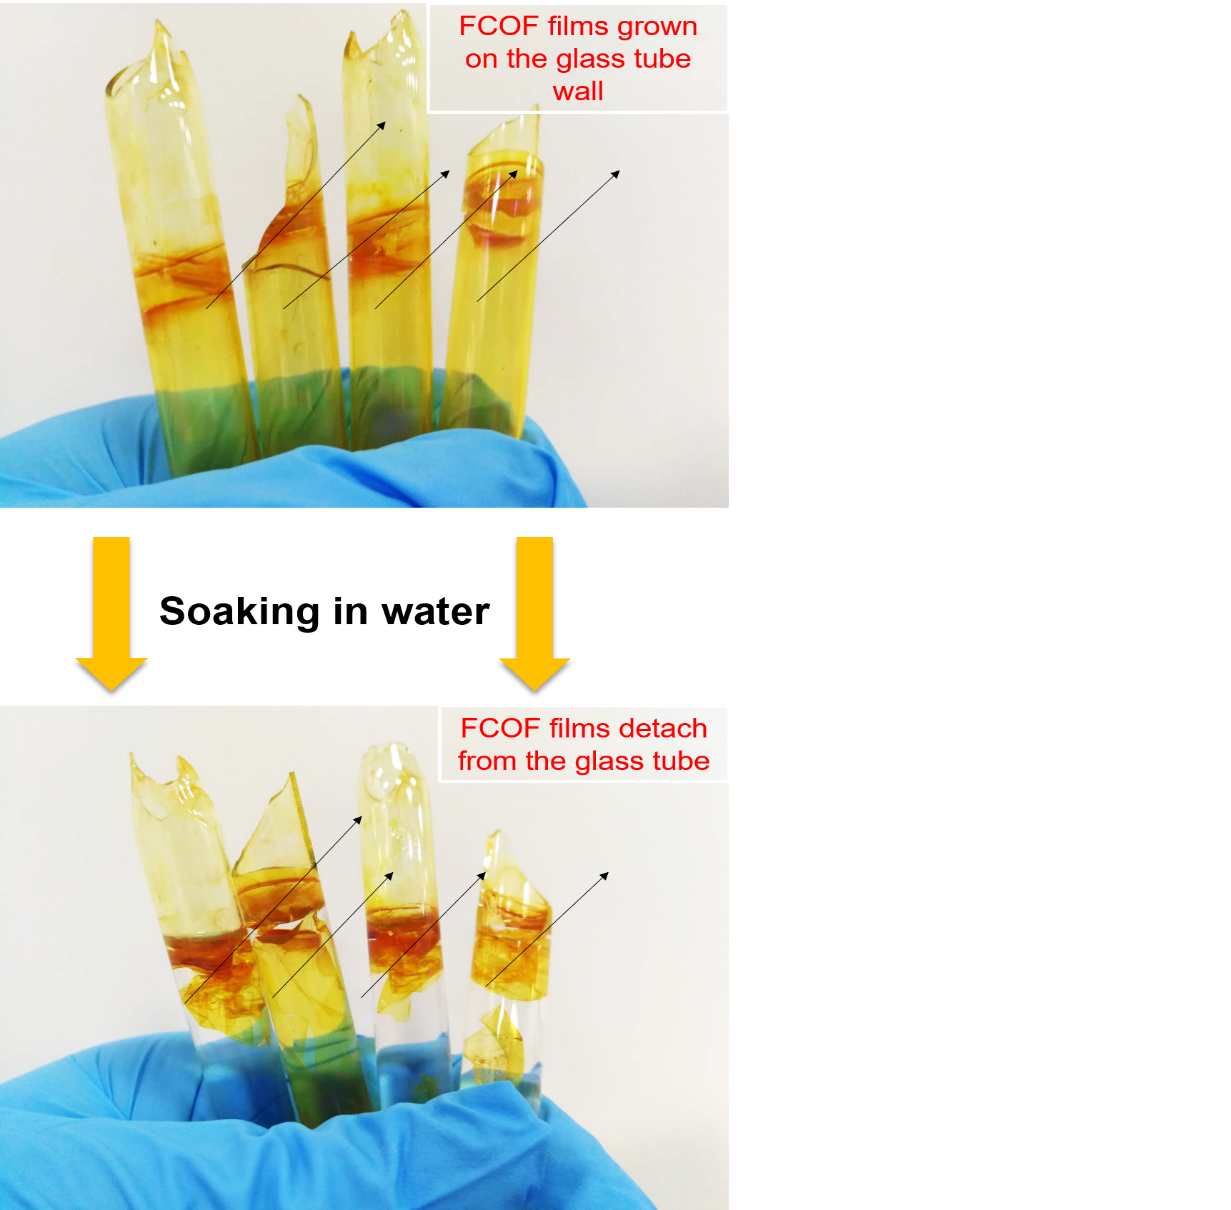


**Supplementary Fig. 5: The transferring process of the FCOF film from the glass tubes.**


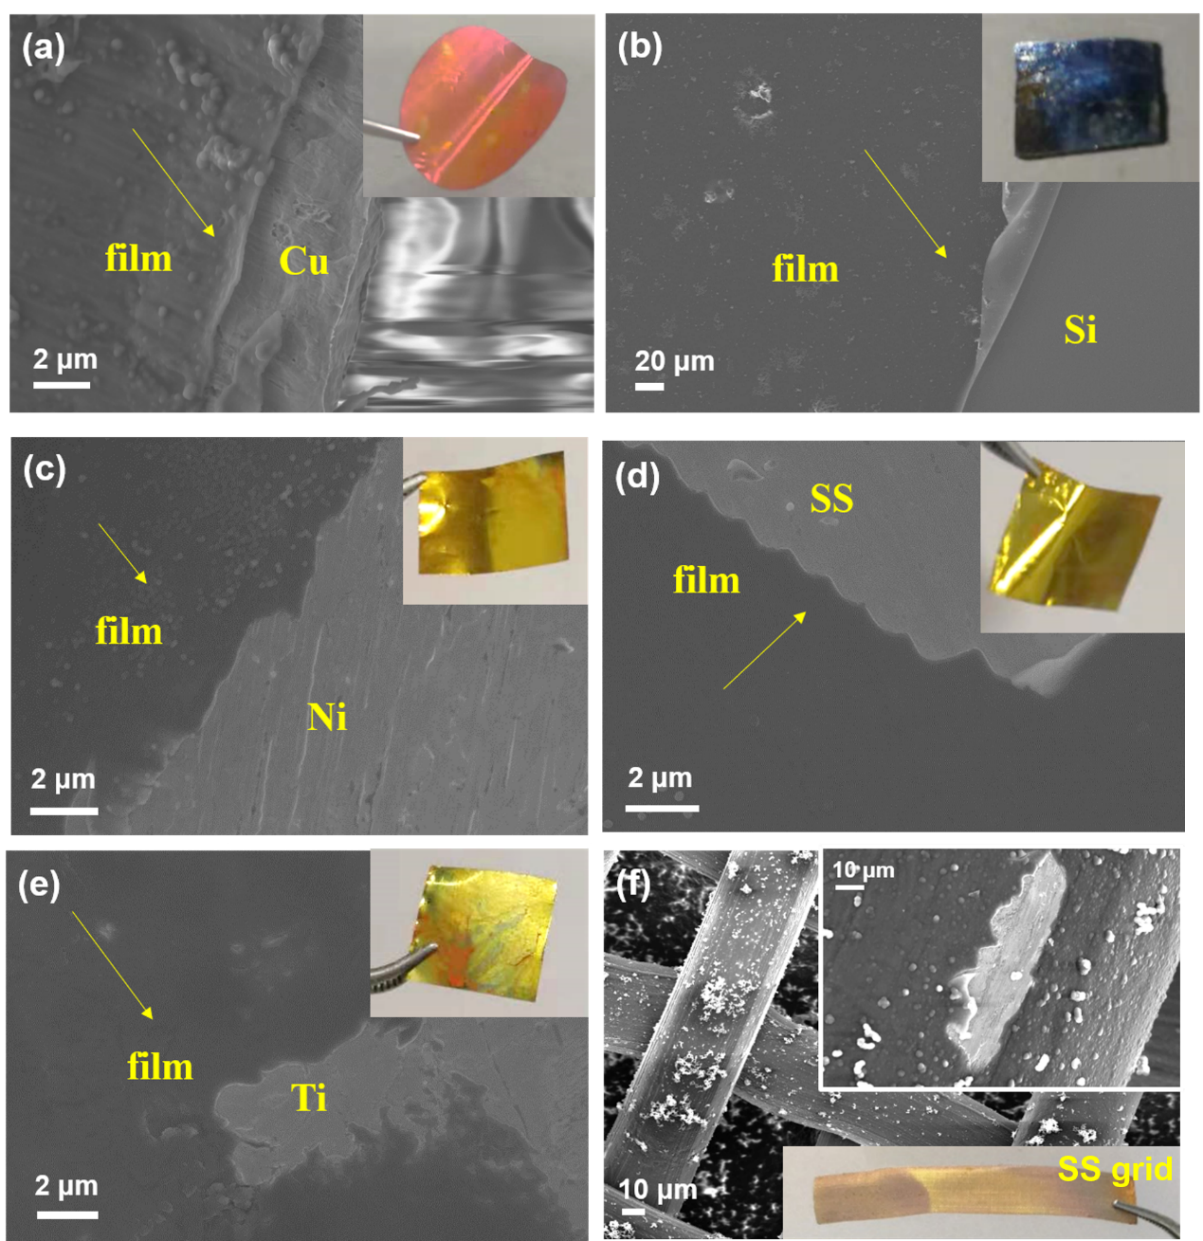


**Supplementary Fig. 6: Photos and FESEM images of the FCOF films grown on various substrates including Cu, Si, Ni, Stainless Steel (SS), Ti and SS grid.**


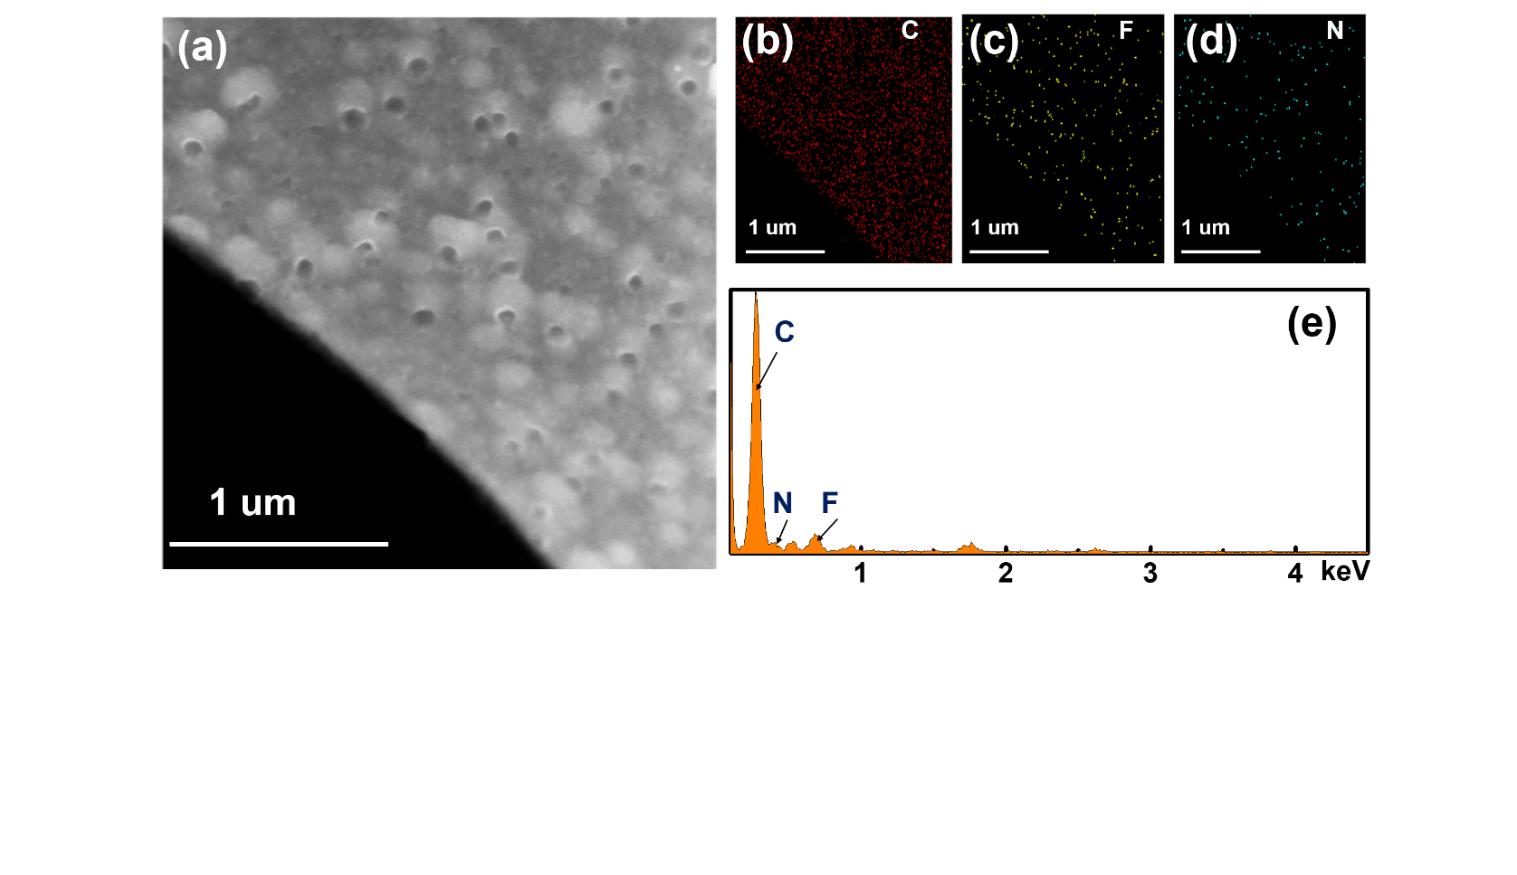


**Supplementary Fig. 7: TEM image of the FCOF film and the corresponding EDX results of C, F, and N elements.**


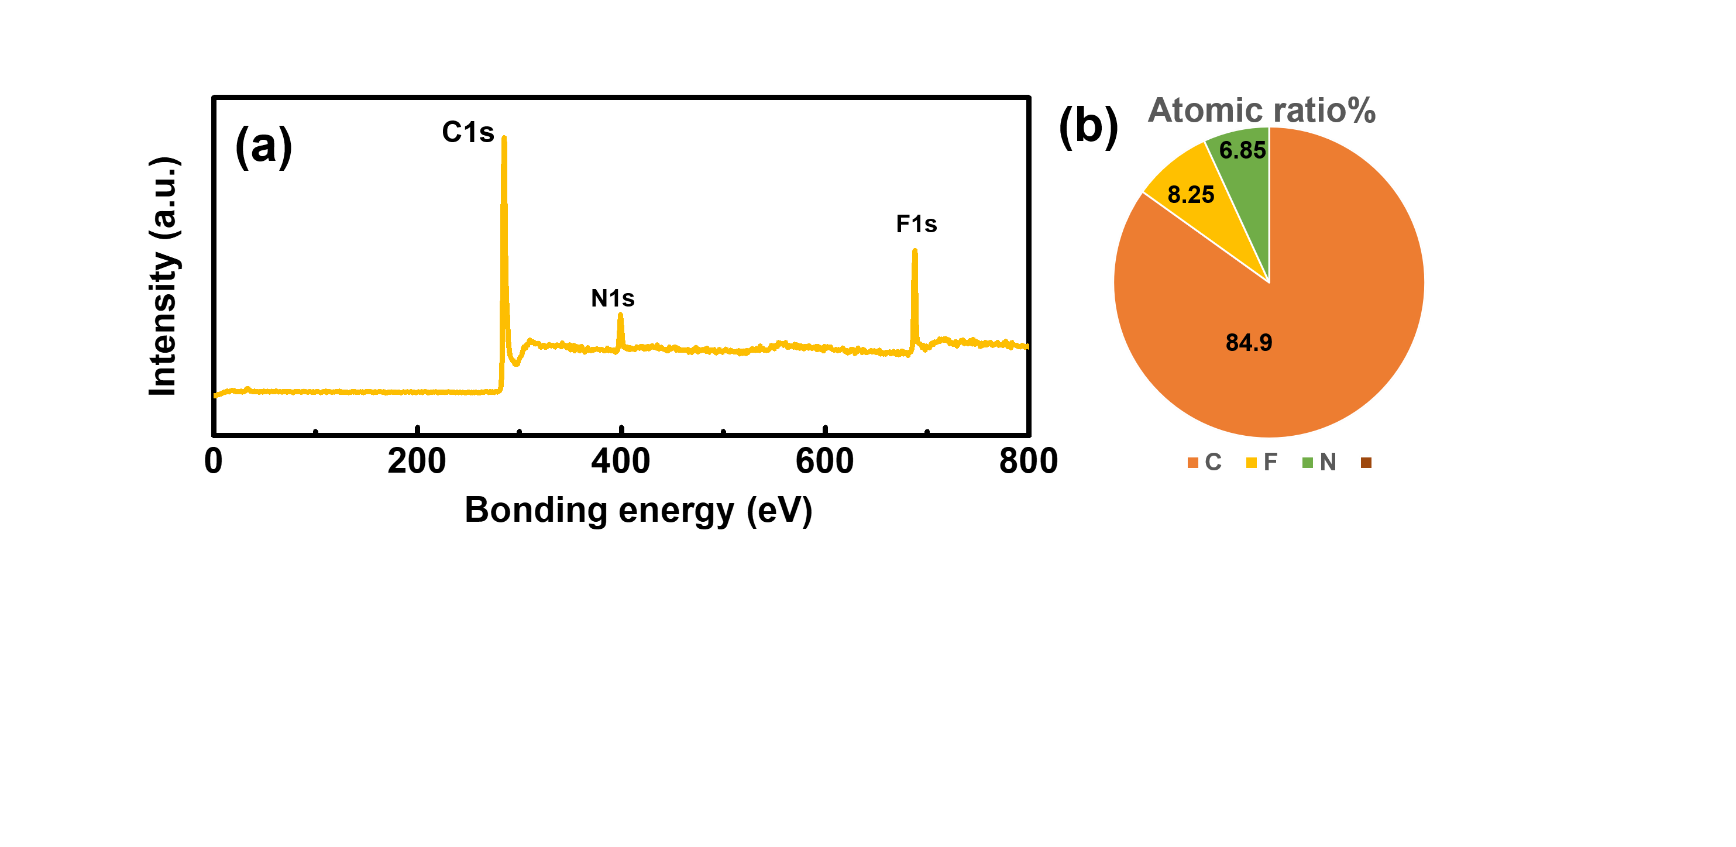


**Supplementary Fig. 8: XPS full energy spectrum of FCOF film and atomic ratio of C, N, and F elements.**


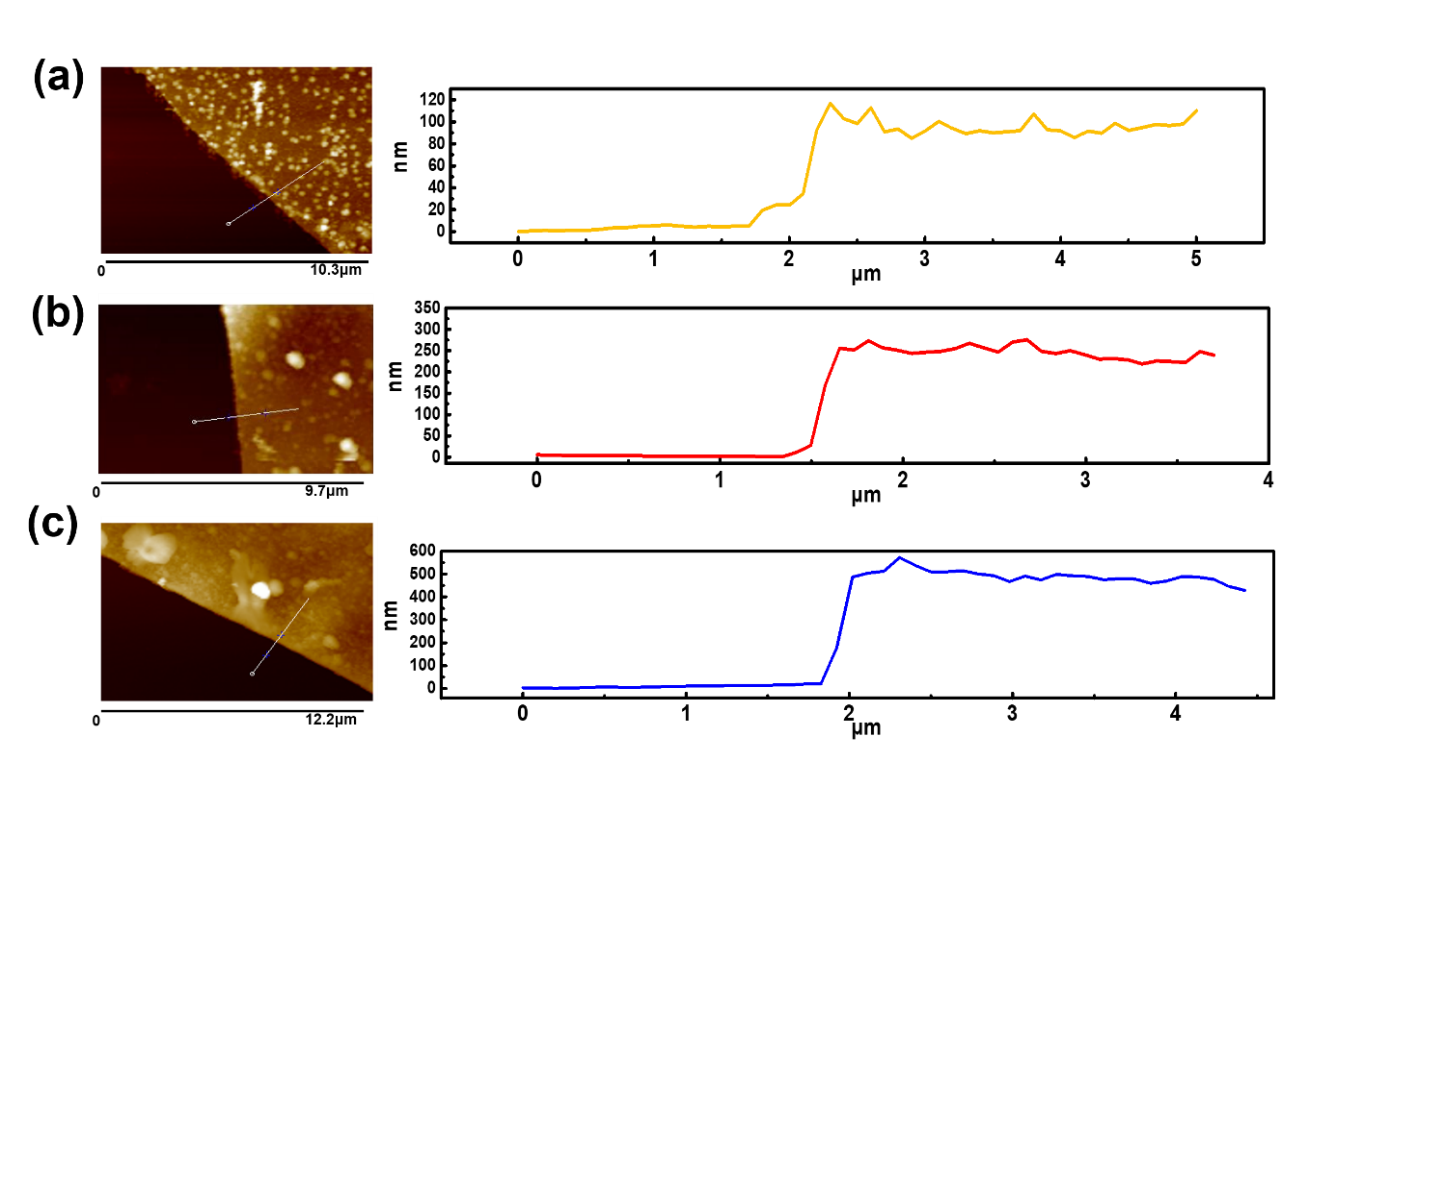


**Supplementary Fig. 9: AFM results of the FCOF films.** Three different thickness: **a** ~100nm, **b** ~250nm and **c** ~500nm of the films are prepared**.**


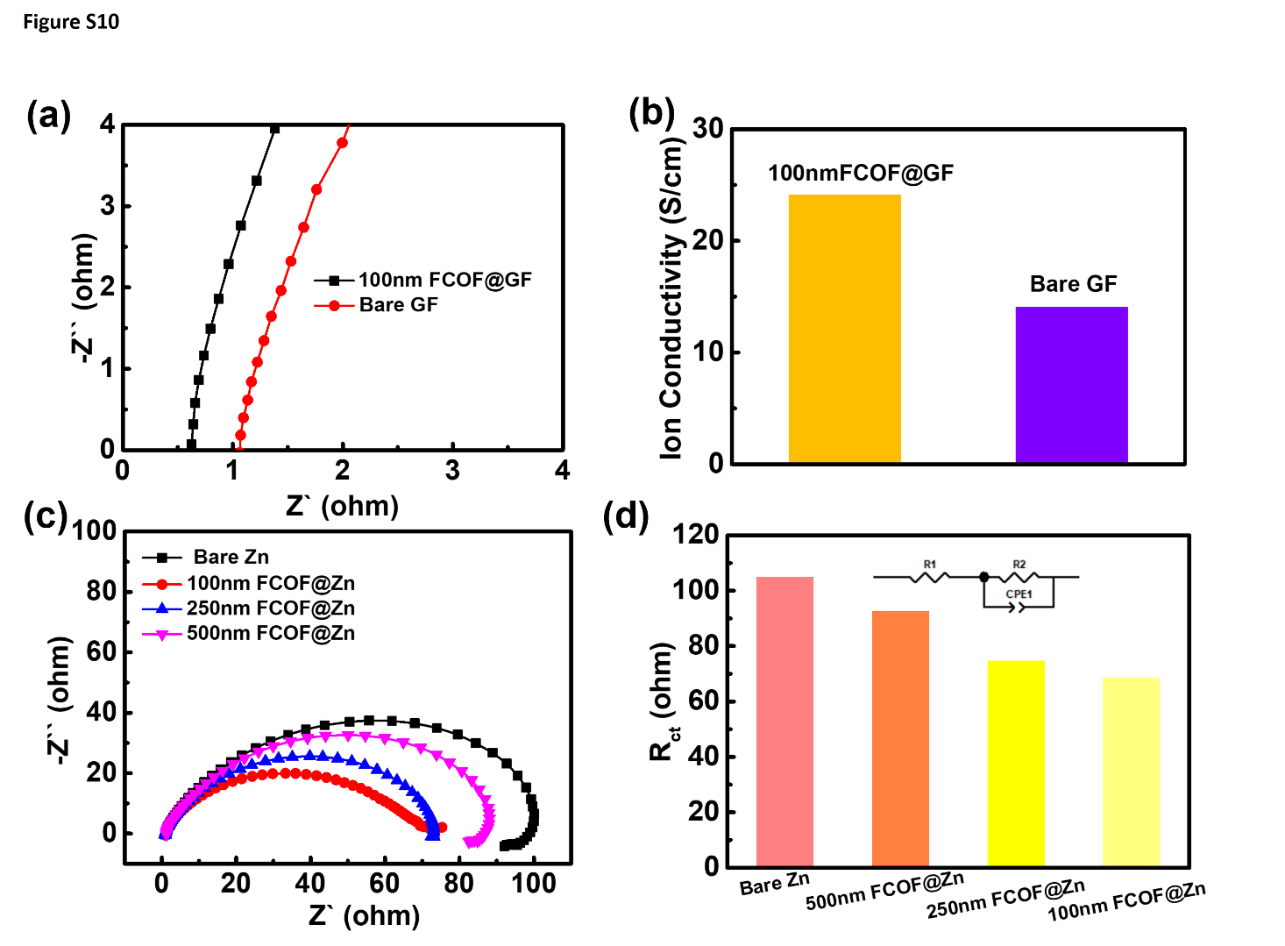


**Supplementary Fig. 10: Characterization of Zn2+ ion transport behavior of the FCOF films. a** EIS results of the symmetric cells in SS/FCOF@GF or bare GF /SS configurations (immersed in 2M ZnSO4). **b** Calculated ion conductivity based on the EIS results. **c** The EIS results of the symmetric cells in FCOF@Zn/FCOF@Zn configurations. **d** Simulated Rct of the symmetric cells according to the equivalent circuit (inset).


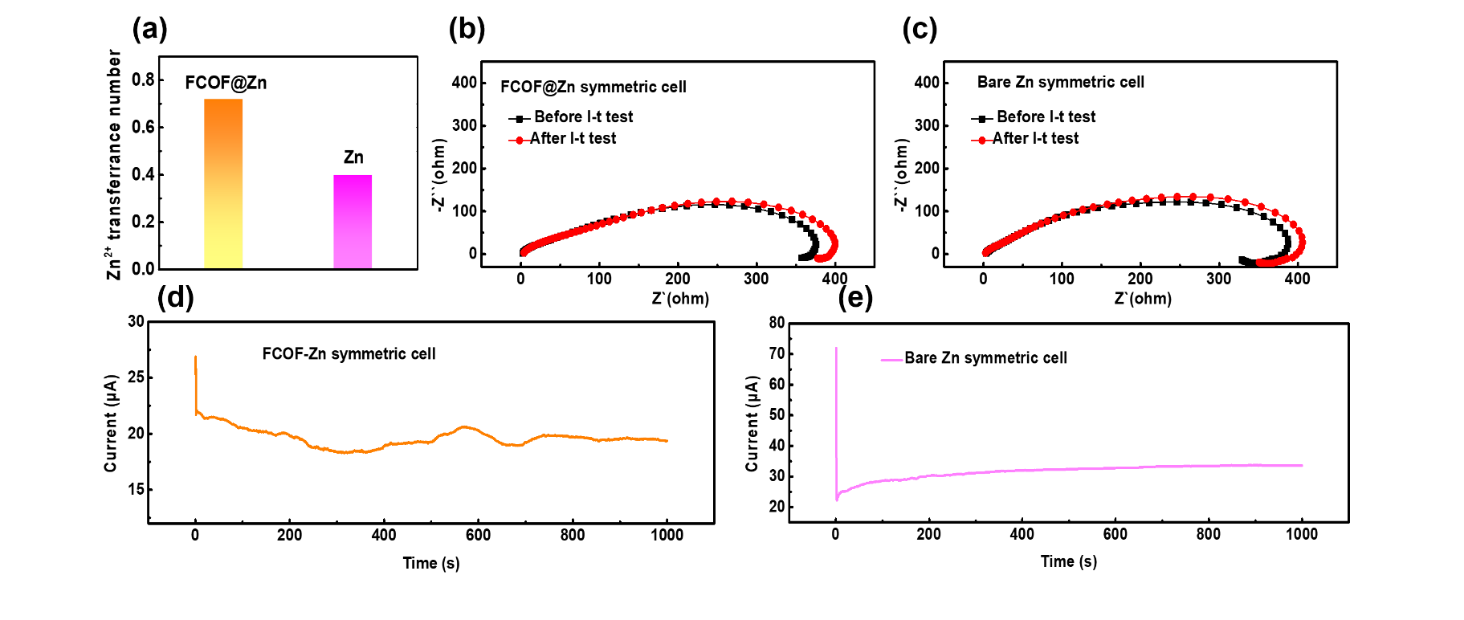


**Supplementary Fig. 11: Calculation of Zn2+ transference number (ZTN) based on the chronoamperometric tests (I-t tests) under a polarization of 20 mV. a** The calculated ZTN for the FCOF@Zn or bare Zn symmetric cells**.** The EIS results of the **b** FCOF@Zn or **c** bare Zn symmetric cells before and after polarization (I-t test). Note that the symmetric cells are rested for 2-3h to ensure the accuracy of the test, therefore the impedance is higher than the that of Supplementary Fig. 10c. The I-t curves of the of the **d** FCOF@Zn or **e** bare Zn symmetric cells. Considering the EIS results remain nearly unchanged before and afterpolarization, the ZTN can be calculated by using the simplified equation *I*/*I0*, where *I0*represents the initial current and *I* represents the equilibrium current.

**
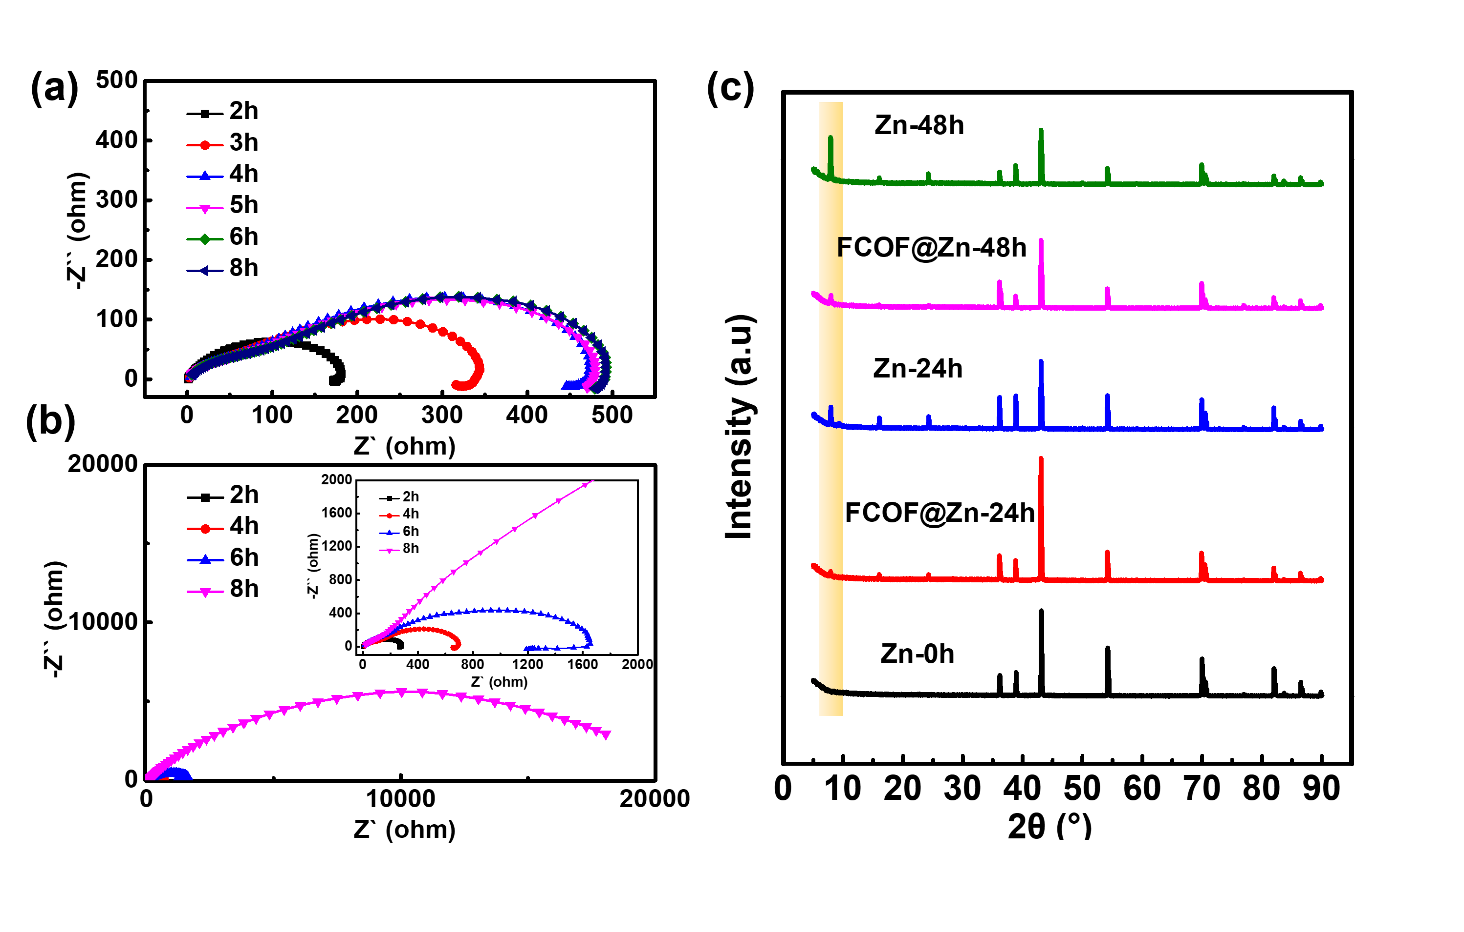
**

**Supplementary Fig. 12: Comparison of the electrolyte anticorrosion property of the FCOF@Zn and bare Zn anodes.** Time-dependent EIS results of the **a** FCOF@Zn or **b** bare Zn symmetric cells. **c** Time-dependent XRD patterns of the FCOF@Zn and bare Zn anodes after immersing in 2M ZnSO4.

**
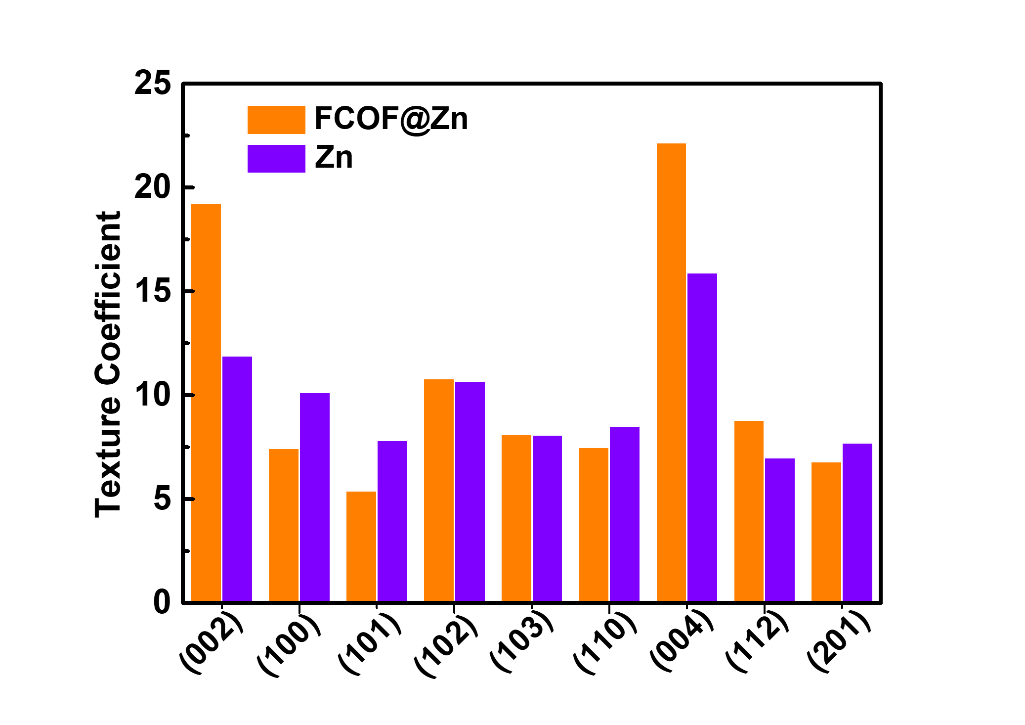
**

**Supplementary Fig. 13: The calculated texture coefficients of different crystal planes of Zn.**

The preferred orientations of Zn deposits can be determined calculating the texture coefficient (Tc) according to equation:

where 𝐼(ℎ𝑘𝑙) is the peak intensity of zinc electrodeposits and *∑ I* is the sum of the intensities of independent peaks. The index 0 refers to the intensities for the standard Zn sample taken from a powder diffraction file (PDF) card (PDF# 99-0110). n is the number of diffraction planes considered in the analysis.


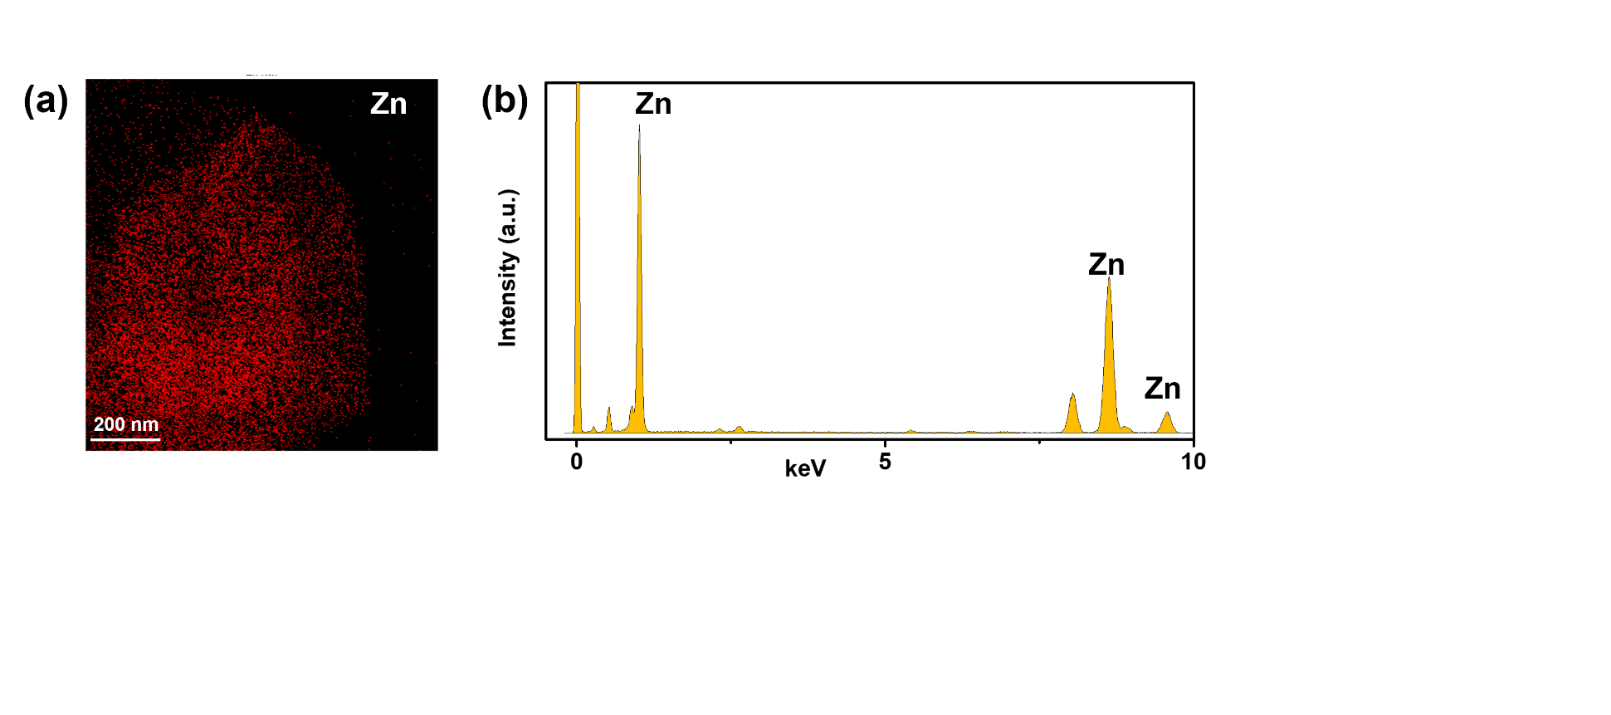


**Supplementary Fig. 14: The EDX results of a Zn platelet after** **stripping off the FCOF film under HRTEM test.**


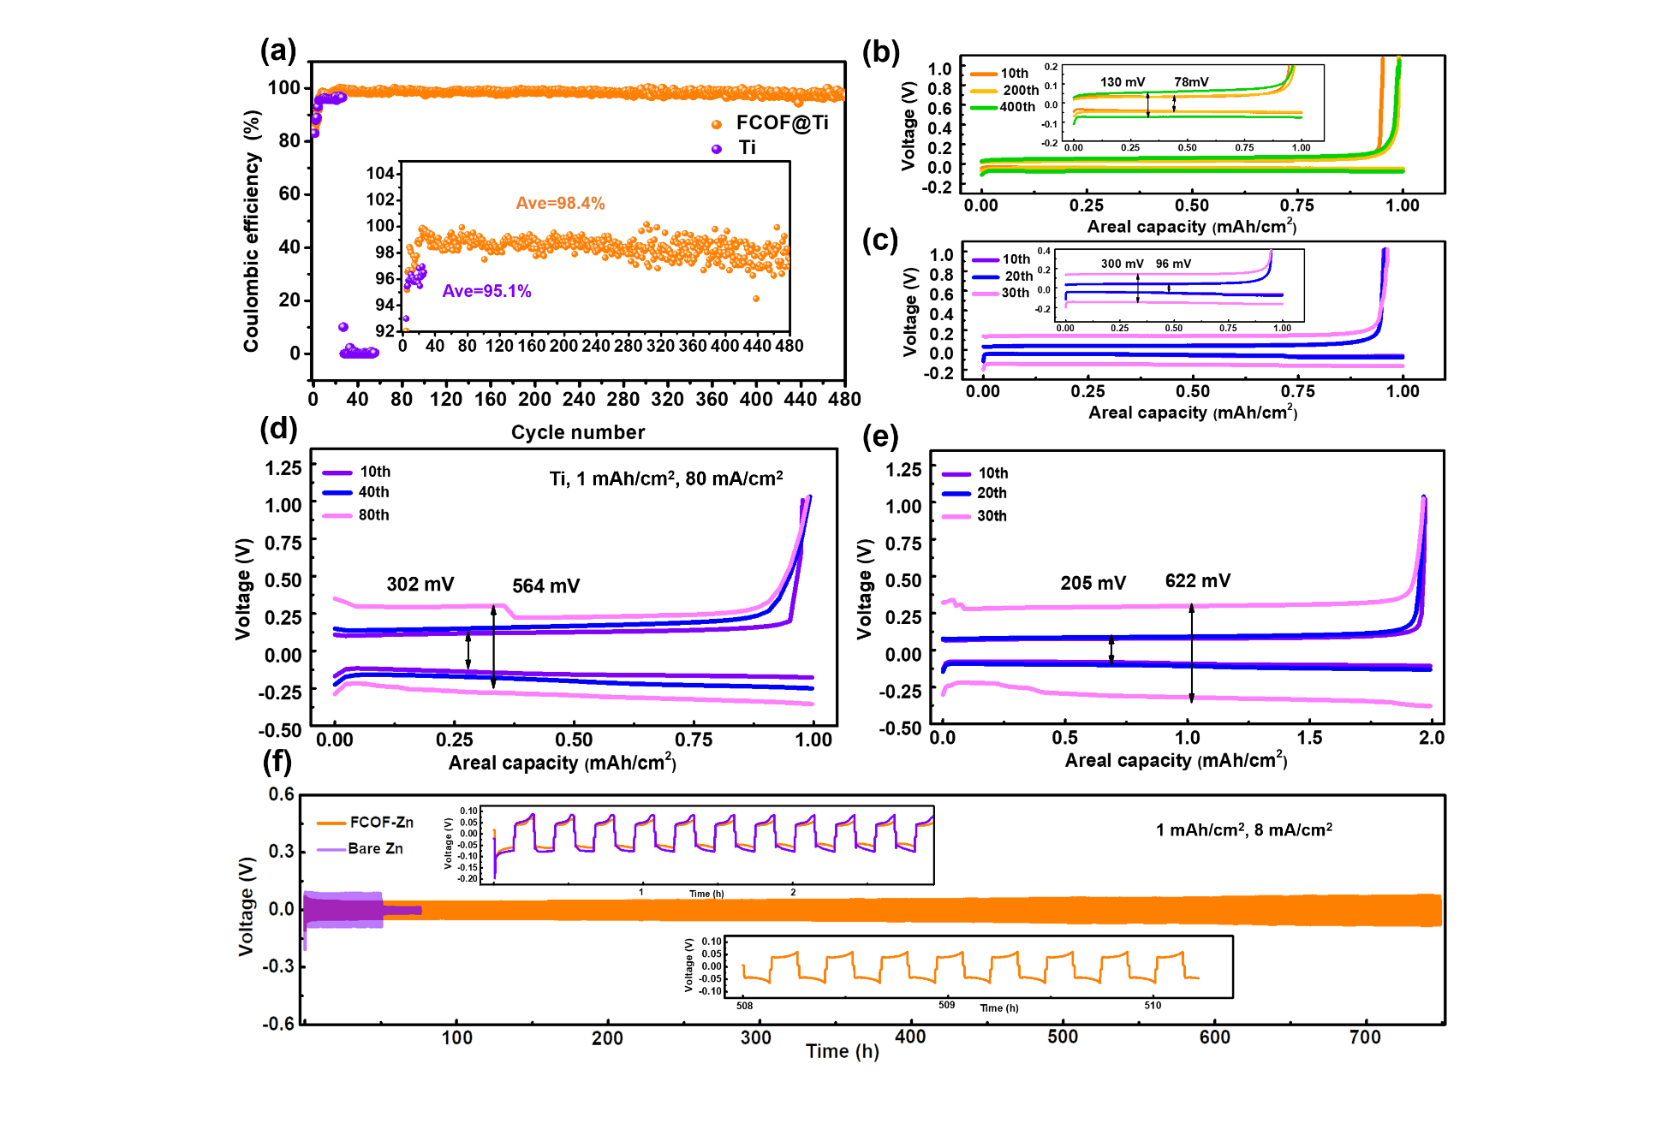


**Supplementary Fig. 15: The electrochemical performance of Zn anodes. a:** CE of Zn plating/stripping on FCOF film- coated Ti and bare Ti at 1 mAh/cm2, 5 mA/cm2. **b-e:** The voltage profiles at selected cycles. The insets are enlarged voltage profiles. **f**: Cycling performance of Zn symmetric cells with or without FCOF film protection at g: 1 mAh/cm2 and 8 mA/cm2.


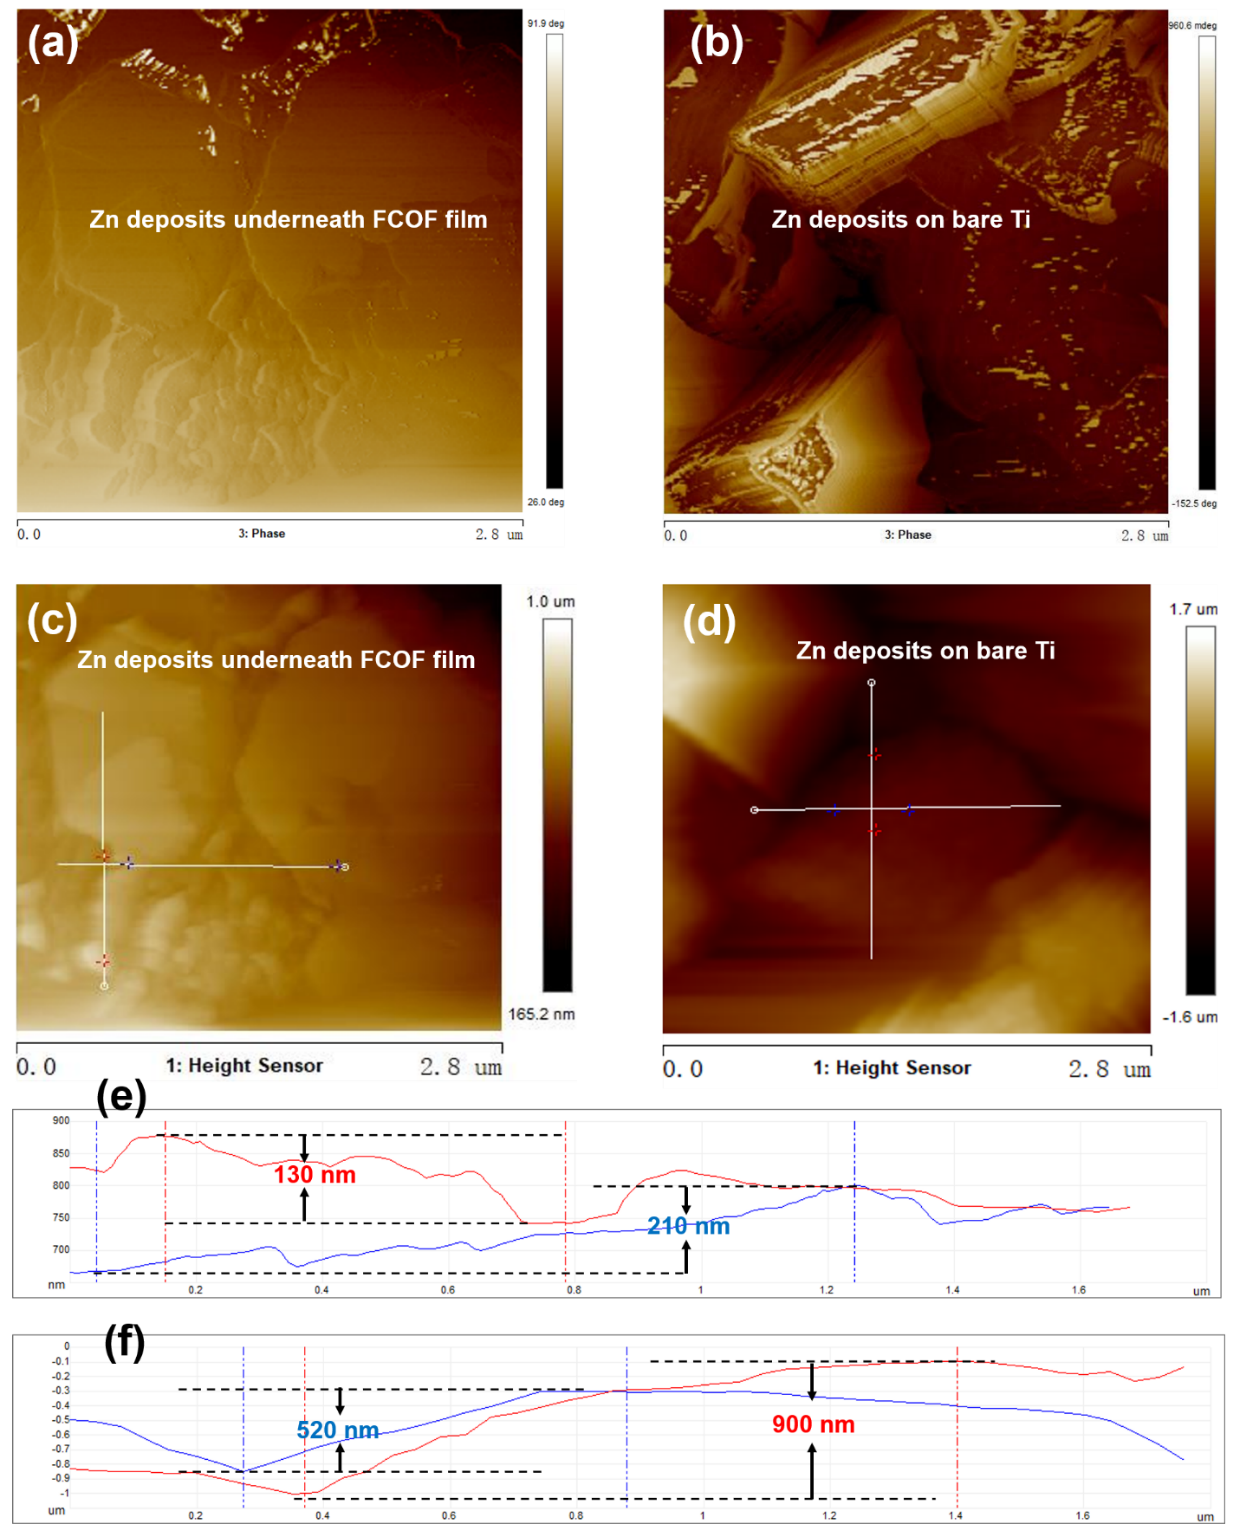


**Supplementary Fig. 16: AFM characterization of Zn deposits after cycling (100 cycles at 1mAh/cm2, 5mA/cm2). a-b** Phase and **c-d** height imaging of Zn deposits on FCOF film coated or bare Ti. (C) Height profiles along X (blue) and Y(red) axis of Zn deposits on **e**: FCOF film coated or **f**: bare Ti.


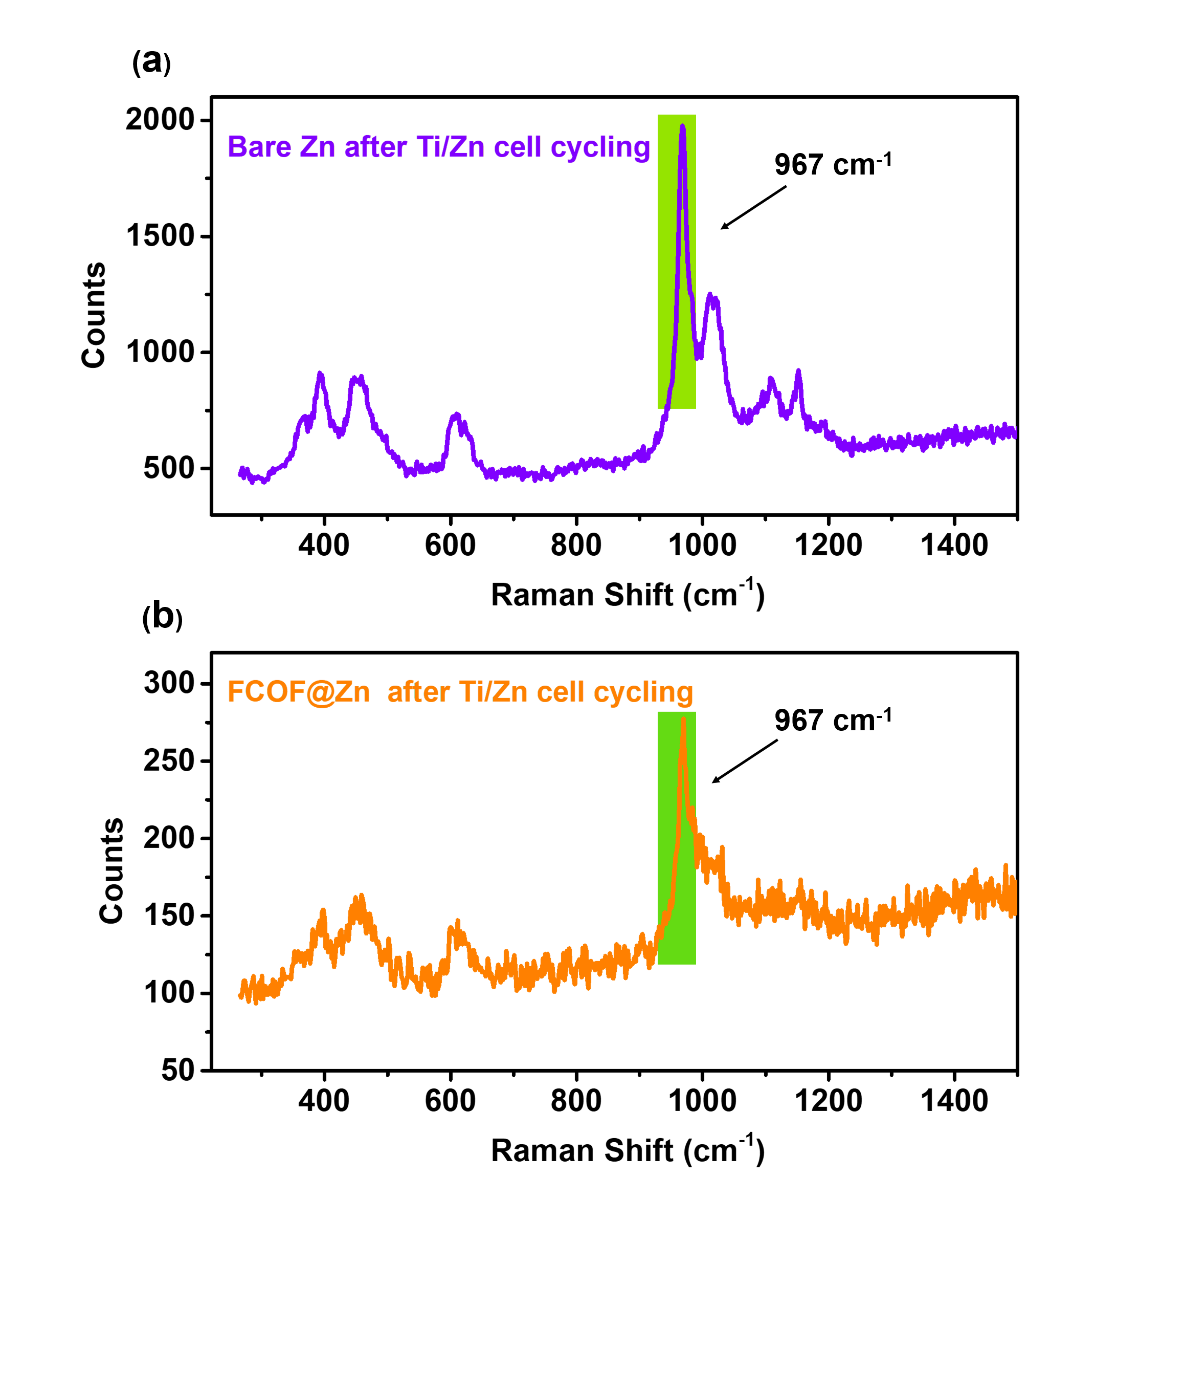


**Supplementary Fig. 17:** Raman spectra of the Zn deposits after cycling on **a**: bare Ti and **b**: FCOF coated Ti. The dominant peak at 967 cm-1 is chosen to show the Raman mapping.

| *Ref (Ti/Zn asymmetric cell)* | *Capacity* | *Current Density* | *Cycle number* |
| --- | --- | --- | --- |
| Angew. Chem. Int. Ed. 2021, 60, 2–9 | 1 mAh/cm2 | 0.5 mA/cm2 | 50 |
| Angew.Chem. Int. Ed. 2020, 59,19292 –19296 | 0.5 mAh/cm2 | 1 mA/cm2 | 300 |
| J. Mater. Chem. A, 2021, 9, 5597-5605 | 0.5 mAh/cm2 | **/** | 300 |
| Nano-Micro Lett. (2021) 13:79 | 5 mAh/cm2 | 5 mA/cm2 | 14 |
| Energy Environ. Sci., 2019, 12, 1938-1949 | 0.4 mAh/cm2 | 0.4 mA/cm2 | 300 |
| Advanced Functional Materials, 2020, 30(13): 1908528. | 1 mAh/cm2 | 5 mA/cm2 | 210 |
| Materials Today Energy 18 (2020) 100563 | 2.5 mAh/cm2 | 2.5 mA/cm2 | 60 |
| Advanced Functional Materials, 2021, 31(2): 2001867. | 0.885 mAh/cm2 | 1.77 mA/cm2 | 1000 |
| J. Am. Chem. Soc. 2020, 142, 21404−21409 | 0.5 mAh/cm2 | 1 mA/cm2 | 400 |
| Energy Storage Materials 27 (2020) 1–8 | 0.5 mAh/cm2 | 0.5 mA/cm2 | 50 |
| Advanced Materials, 2020, 32(33): 2003425. | 1 mAh/cm2 | 2 mA/cm2 | 20 |
| Journal of Materials Chemistry A, 2020, 8(34): 17725-17731. | / | 1 mA/cm2 | 300 |
| Nature communications, 2019, 10(1): 1-12. | 1 mAh/cm2 | 0.5 mA/cm2 | 45 |
| Present work | **1 mAh/cm2** | **5 mA/cm2** | **480** |
| Present work | **1 mAh/cm2** | **80 mA/cm2** | **320** |
| Present work | **2 mAh/cm2** | **40 mA/cm2** | **260** |

**Supplementary Table 1: Cycle number and current density comparison of CE of Zn plating/stripping for the reported Zn aqueous batteries.**

| *Ref (symmetric cell)* | *Capacity* | *Current Density* | *Cycle life* |
| --- | --- | --- | --- |
| ACS Energy Letters, 2020, 5(9): 3012-3020. | 2 mAh/cm2 | 10 mA/cm2 | 400 h |
| ACS Energy Lett. 2021, 6, 395−403 | 0.067 mAh/cm2 | 0.2 mA/cm2 | 170 h |
| ACS Energy Lett. 2021, 6, 675−683 | 0.1 mAh/cm2 | 5 mA/cm2 | 370 h |
| Adv. Energy Mater. 2021, 11, 2003419 | 1 mAh/cm2 | 4 mA/cm2 | 116 h |
| Adv. Funct. Mater. 2021, 31, 2006495 | 0.1 mAh/cm2 | 0.1 mA/cm2 | 200 h |
| Adv. Mater. 2021, 33, 2007497 | 1 mAh/cm2 | 4 mA/cm2 | 300 h |
| Adv. Mater. 2021, 2007416 | 1 mAh/cm2 | 5 mA/cm2 | 220 h |
| Adv. Mater. 2021, 2007388 | 1 mAh/cm2 | 1 mA/cm2 | 800 h |
| Adv. Mater. 2021, 2007406 | 1 mAh/cm2 | 5 mA/cm2 | 2500 h |
| Energy Storage Materials 36 (2021) 132–138 | 1 mAh/cm2 | 2 mA/cm2 | 400 h |
| Journal of Energy Chemistry 55 (2021) 549–556 | 0.5 mAh/cm2 | 0.5 mA/cm2 | 240 h |
| Nano-Micro Lett. (2021) 13:79 | 1 mAh/cm2 | 1 mA/cm2 | 2000 h |
| Nano Energy 80 (2021) 105478 | 0.5 mAh/cm2 | 5 mA/cm2 | 800 h |
| Angew. Chem. Int. Ed. 2021, 60, 2–9 | 0.2 mAh/cm2 | 1 mA/cm2 | 800 h |
| Nature communications, 2020, 11(1): 1-9. | 1 mAh/cm2 | 0.5 mA/cm2 | 2000 h |
| Nature communications, 2020, 11(1): 1-7. | 1 mAh/cm2 | 1 mA/cm2 | 460 h |
| Energy & Environmental Science, 2020, 13(2): 503-510. | 1.25 mAh/cm2 | 5 mA/cm2 | 500 h |
| Nature materials, 2018, 17(6): 543-549. | 0.033 mAh/cm2 | 0.2 mA/cm2 | 170 h |
| Present work | **1 mAh/cm2** | **5 mA/cm2** | **1700 h** |
| Present work | **1 mAh/cm2** | **40 mA/cm2** | **700 h** |

**Supplementary Table 2: Cycle life comparison of symmetric Zn cells in reported Zn aqueous batteries.**


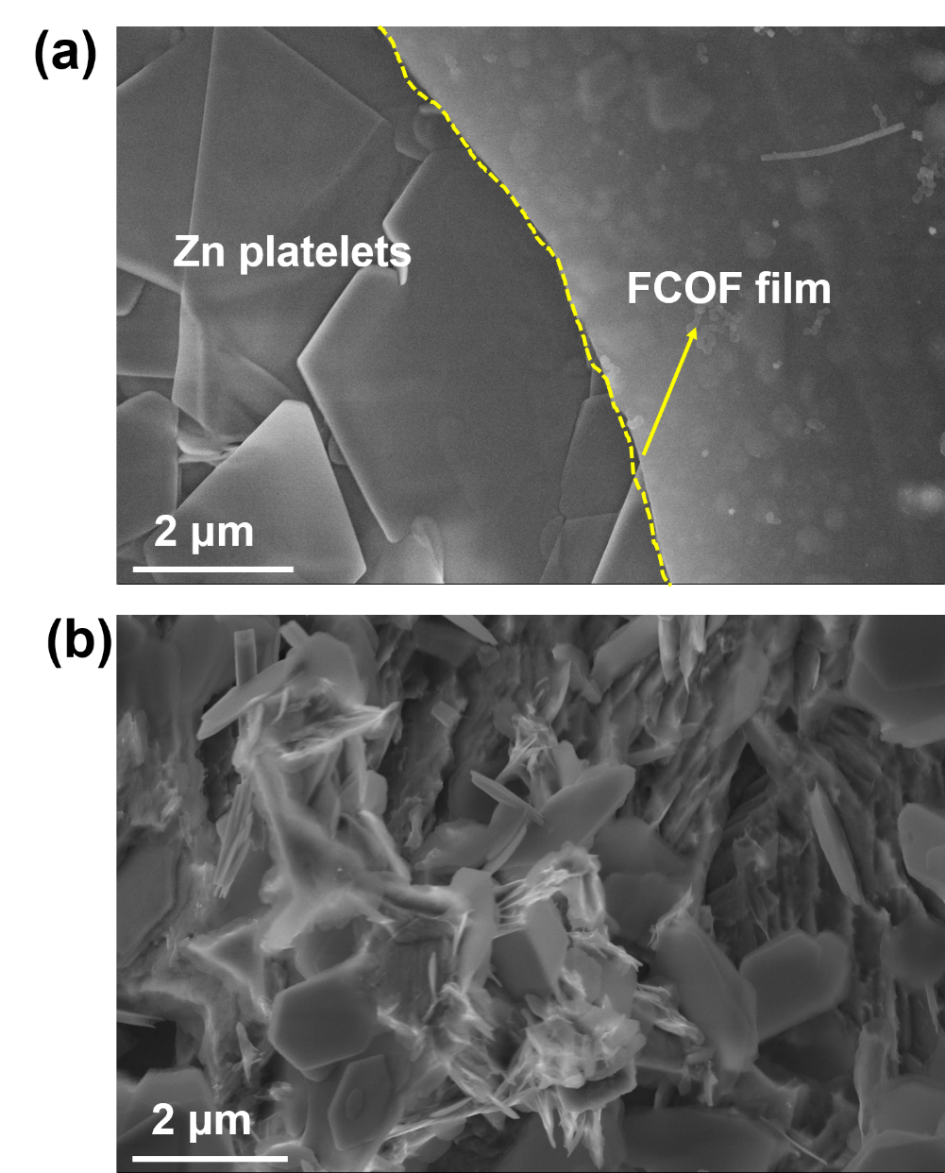


**Supplementary Fig. 18: FESEM images of the Zn anode surface after long cycling.** The morphologies of **a** FCOF@Zn and **b** bare Zn anode.

**
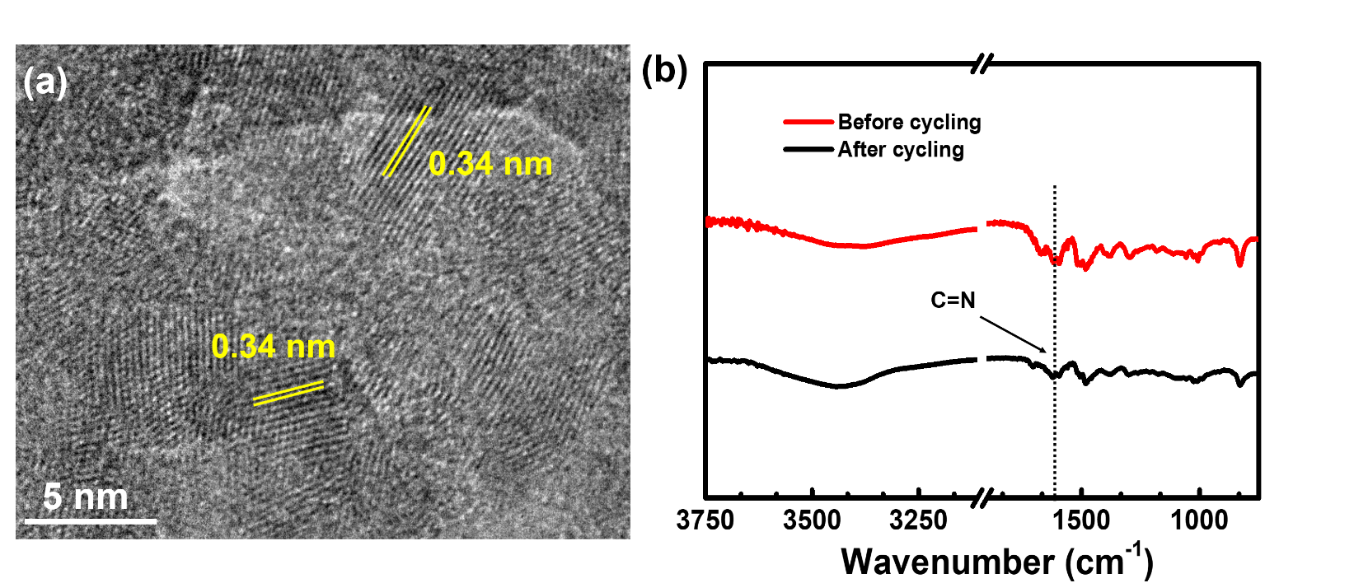
**

**Supplementary Fig. 19: The characterization of the FCOF film after cycling. a** HRTEM image clearly shows the interlayer spacing of 0.34nm, indicating the well-maintained 2D stacked structure. **b** FTIR results before and after cycling show the obvious peak density of the C=N bond, demonstrating the strong stability of the covalent linked chemical structure in FCOF films.

**
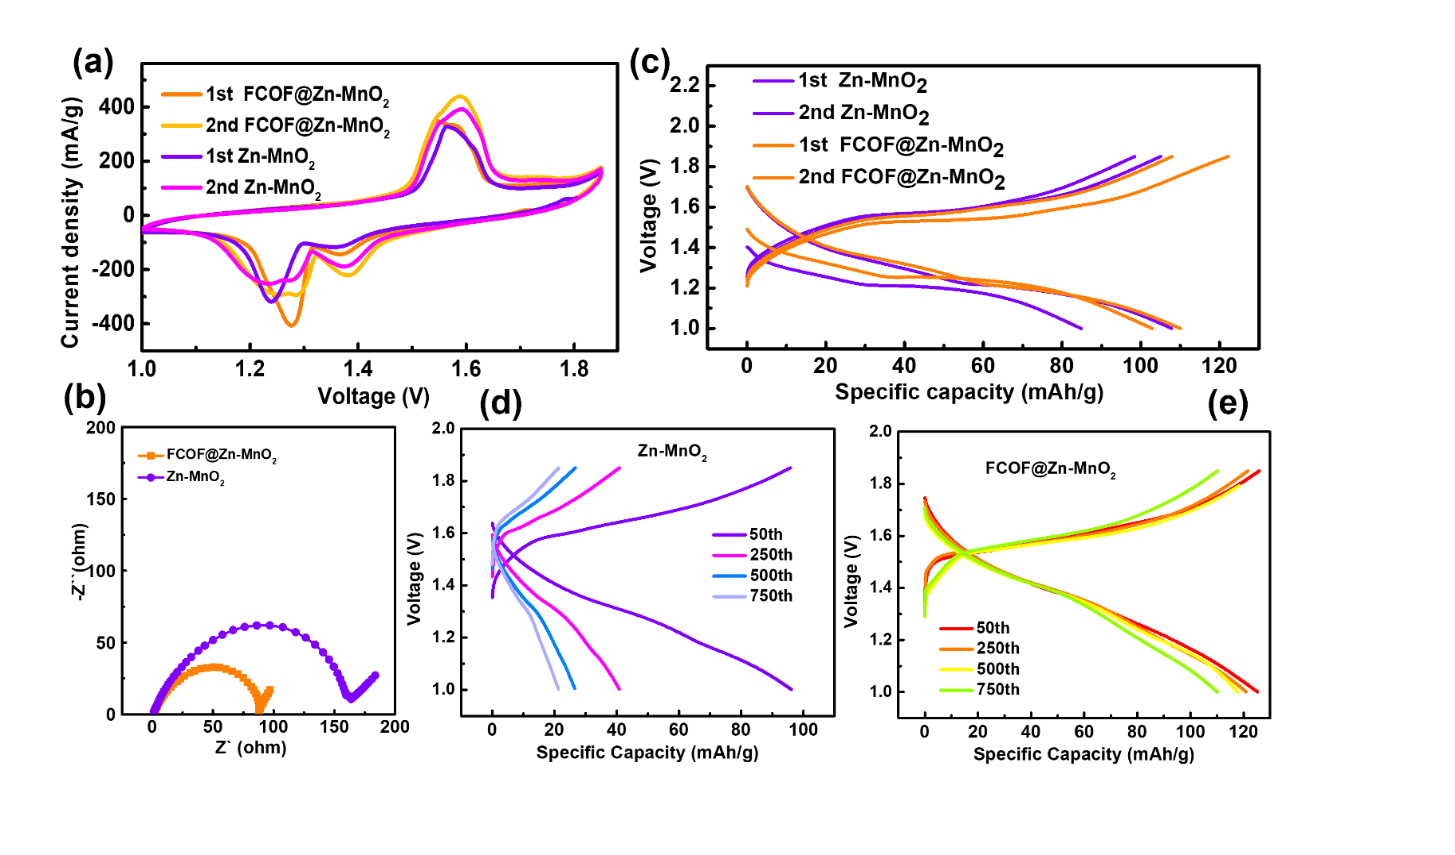
**

**Supplementary Fig. 20: Electrochemical results of the full cells. a** 1st and 2nd CV curves of FCOF@Zn-MnO2 and Zn-MnO2 full cells. **b** 1st and 2nd charge/discharge profiles of the FCOF@Zn-MnO2 and Zn-MnO2 full cells. **c** EIS results of FCOF@Zn-MnO2 and Zn-MnO2 full cells. The 50th, 250th, 500th and 750th charge/discharge profiles of **e** FCOF@Zn-MnO2 and **d** Zn-MnO2 full cells


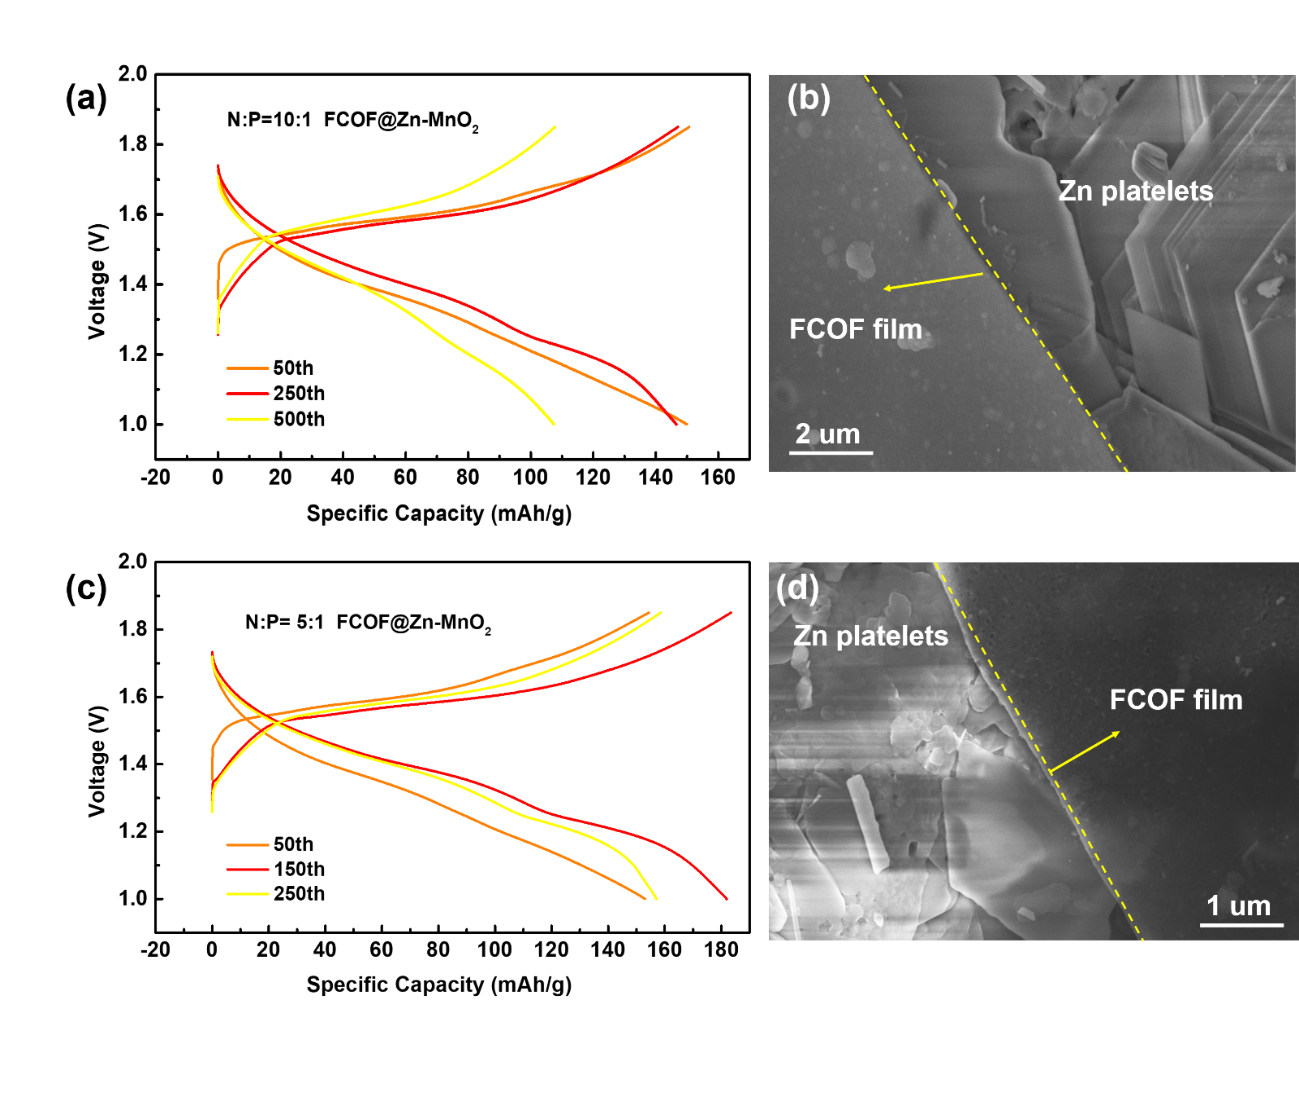


**Supplementary Fig. 21: Electrochemical results of the FCOF@Zn-MnO2** **full cells at depth of discharge (DOD) of 10% and 20%, respectively.** Thecharge/discharge profiles and FESEM images of the FCOF@Zn anodes after long cycling at N/P ratio of **a, b** 10:1 and **c, d** 5:1.


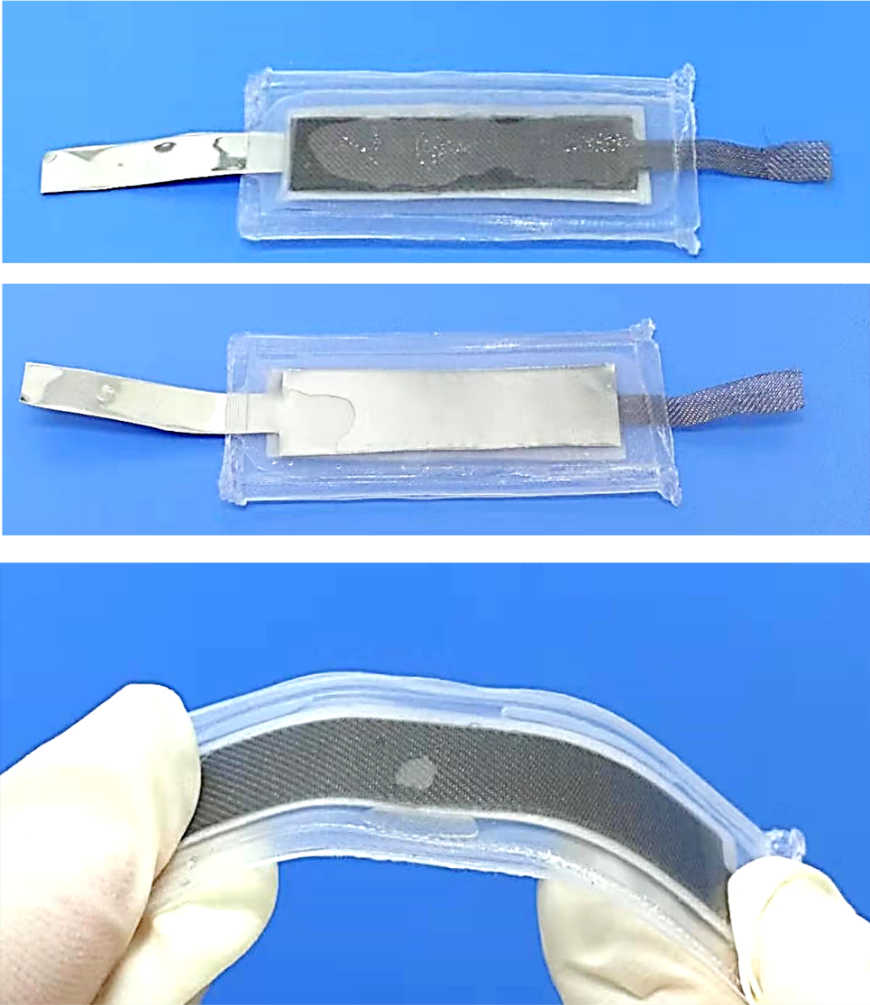


**Supplementary Fig. 22: Pictures of the flexible transparent battery.**


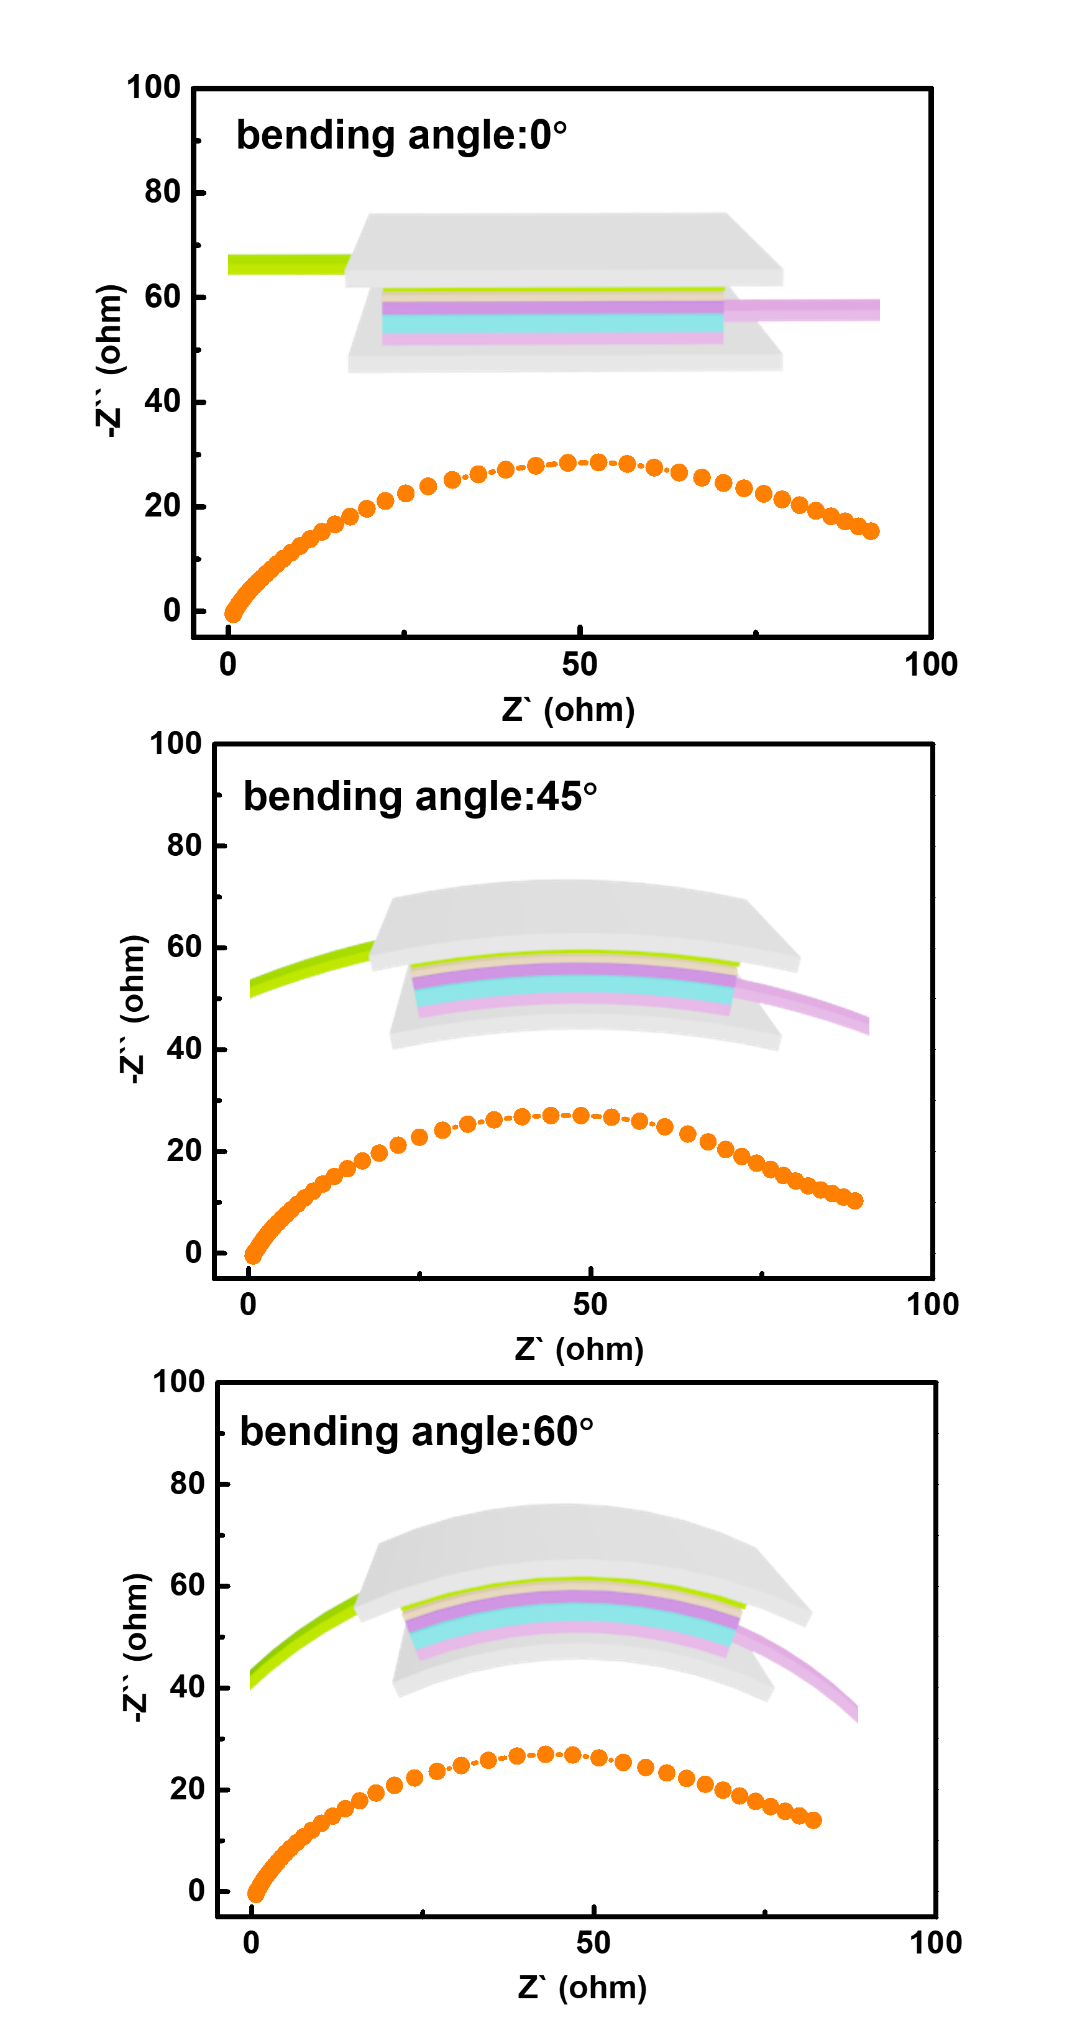


**Supplementary Fig. 23: EIS results of the flexible battery at different bending angles.**

**
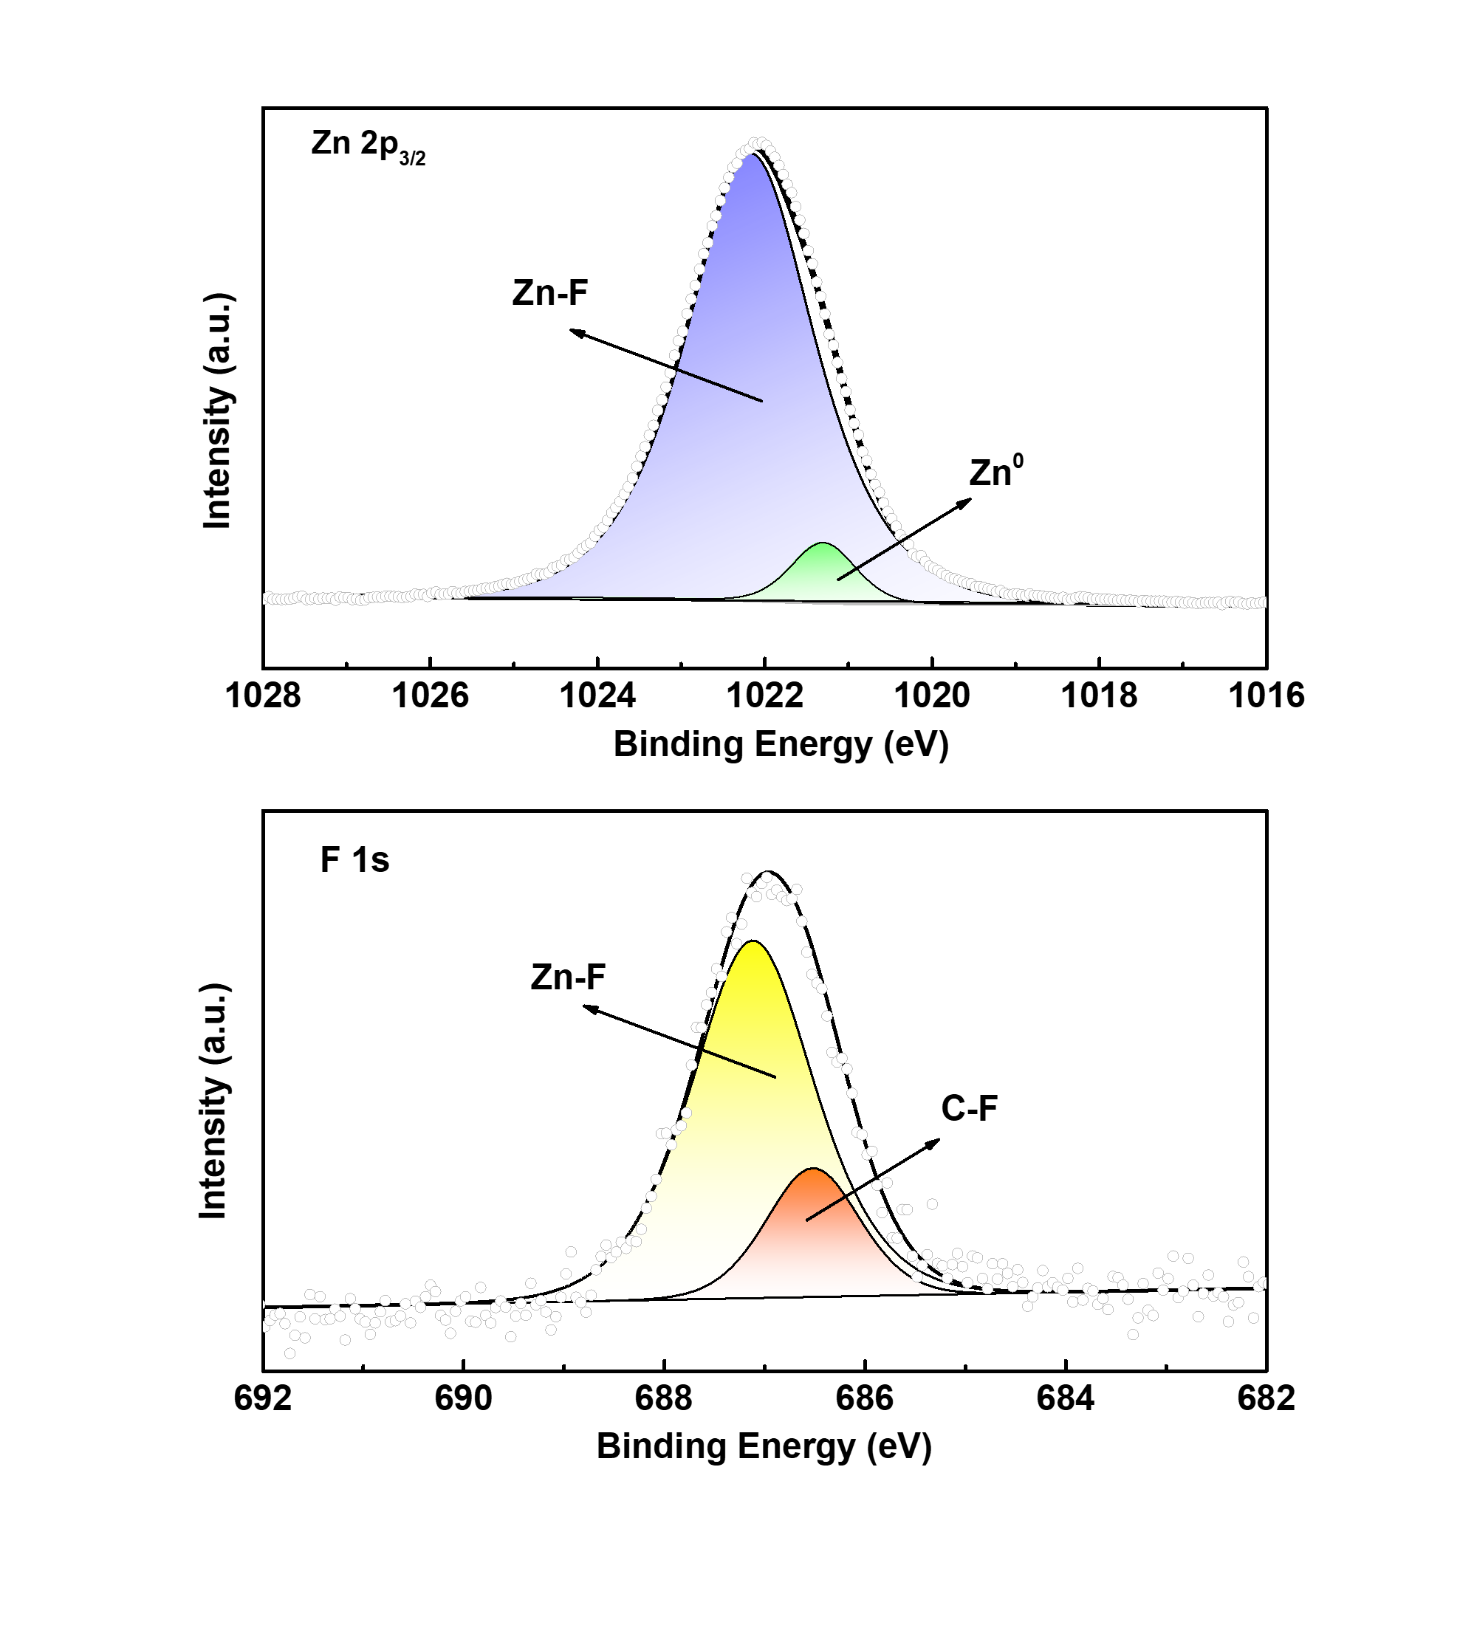
**

**Supplementary Fig. 24: XPS results of the F 1s and Zn 2p at the FCOF-Zn interface.**
